# Supplementary material for: Synthesis and luminescence behaviour of novel heterodecanuclear silver(i)–rhenium(i) alkynyl complexes. X-Ray crystal structures of [Ag6(μ-dppm)4{μ3-CCCC–Re(Me2bpy)(CO)3}4](PF6)2and [Ag6(μ-dppm)4{μ3-CCCC–Re(Br2phen)(CO)3}4](PF6)2
Source: Royal Society of Chemistry journal article supplement (doi:10.1039/b307479j), 2003-01-01
Supplement: b307479j.pdf [file b307479j.pdf]

**Synthesis and luminescence behaviour of novel heterodecanuclear silver(I)-rhenium(I) alkynyl complexes. X-Ray crystal structures of [Ag<sub>6</sub>(m-dppm)<sub>4</sub>{m<sub>3</sub>-C<sup>o</sup>CC<sup>o</sup>C-Re(Me<sub>2</sub>bpy)(CO)<sub>3</sub>}<sub>4</sub>](PF<sub>6</sub>)<sub>2</sub> and [Ag<sub>6</sub>(m-dppm)<sub>4</sub>{m<sub>3</sub>-C<sup>o</sup>CC<sup>o</sup>C-Re(Br<sub>2</sub>phen)(CO)<sub>3</sub>}<sub>4</sub>](PF<sub>6</sub>)<sub>2</sub>**

Vivian Wing-Wah Yam,\* Wing-Yin Lo and Nianyong Zhu

*Centre for Carbon-Rich Molecular and Nano-Scale Metal-Based Materials Research and the Department of Chemistry, The University of Hong Kong, Pokfulam Road, Hong Kong SAR, People's Republic of China*

**Supplementary Information**

## Characterizations

### **[Ag<sub>6</sub>(m-dppm)<sub>4</sub>{m<sub>3</sub>-C<sup>o</sup>CC<sup>o</sup>C-Re(<sup>t</sup>Bu<sub>2</sub>bpy)(CO)<sub>3</sub>}]<sub>4</sub>](PF<sub>6</sub>)<sub>2</sub> (1):**

<sup>1</sup>H NMR (300 MHz, acetone-*d*<sub>6</sub>, 298K)/ ppm: 1.2-1.4 (m, 72H, <sup>t</sup>Bu), 3.4-3.8 (m, 8H, -CH<sub>2</sub>), 6.5-8.6 (m, 104H, pyridyl Hs and -Ph). IR (nujol mull, KBr), v/cm<sup>-1</sup>: 2005s, 1896m [(C≡O)], 2085w [v(C≡C)]. Positive FAB-MS: m/z: 2265 {M-2PF<sub>6</sub>}<sup>2+</sup>. Anal. Calc. for Ag<sub>6</sub>Re<sub>4</sub>C<sub>200</sub>H<sub>184</sub>N<sub>8</sub>O<sub>12</sub>P<sub>10</sub>F<sub>12</sub>: C, 49.82; H, 3.85; N, 2.33. Found: C, 49.73; H, 3.82; N, 2.43.

### **[Ag<sub>6</sub>(m-dppm)<sub>4</sub>{m<sub>3</sub>-C<sup>o</sup>CC<sup>o</sup>C-Re(Me<sub>2</sub>bpy)(CO)<sub>3</sub>}]<sub>4</sub>](PF<sub>6</sub>)<sub>2</sub> (2):**

<sup>1</sup>H NMR (300 MHz, acetone-*d*<sub>6</sub>, 298K)/ppm: 2.1-2.2 (m, 24H, -Me), 3.4-3.5 (m, 8H, -CH<sub>2</sub>), 6.4-8.7 (m, 104H, pyridyl Hs and -Ph). IR (nujol mull, KBr), v/cm<sup>-1</sup>: 2004s, 1891m [(C≡O)], 2087w [v(C≡C)]. Positive FAB-MS: m/z: 2097 {M-2PF<sub>6</sub>}<sup>2+</sup>. Anal. Calc. for Ag<sub>6</sub>Re<sub>4</sub>C<sub>176</sub>H<sub>136</sub>N<sub>8</sub>O<sub>12</sub>P<sub>10</sub>F<sub>12</sub>: C, 47.13; H, 3.06; N, 2.50. Found: C, 47.36; H, 3.25; N, 2.47.

### **[Ag<sub>6</sub>(m-dppm)<sub>4</sub>{m<sub>3</sub>-C<sup>o</sup>CC<sup>o</sup>C-Re(phen)(CO)<sub>3</sub>}]<sub>4</sub>](PF<sub>6</sub>)<sub>2</sub> (3):**

<sup>1</sup>H NMR (300 MHz, acetone-*d*<sub>6</sub>, 298K)/ppm: 3.5-3.6 (m, 8H, -CH<sub>2</sub>), 6.0-9.3 (m, 112H, pyridyl Hs and -Ph). IR (nujol mull, KBr), v/cm<sup>-1</sup>: 2007s, 1900m [(C≡O)], 2084w [v(C≡C)]. Positive FAB-MS: m/z: 2089 {M-2PF<sub>6</sub>}<sup>2+</sup>. Anal. Calc. for Ag<sub>6</sub>Re<sub>4</sub>C<sub>176</sub>H<sub>120</sub>N<sub>8</sub>O<sub>12</sub>P<sub>10</sub>F<sub>12</sub>: C, 47.30; H, 2.71; N, 2.51. Found: C, 47.22; H, 2.90; N, 2.57.

### **[Ag<sub>6</sub>(m-dppm)<sub>4</sub>{m<sub>3</sub>-C<sup>o</sup>CC<sup>o</sup>C-Re(Br<sub>2</sub>phen)(CO)<sub>3</sub>}]<sub>4</sub>](PF<sub>6</sub>)<sub>2</sub> (4):**

<sup>1</sup>H NMR (300 MHz, acetone-*d*<sub>6</sub>, 298K)/ppm: 3.4-3.7 (m, 8H, -CH<sub>2</sub>), 5.9-9.4 (m, 104H, pyridyl Hs and -Ph). IR (nujol mull, KBr), v/cm<sup>-1</sup>: 2009s, 1900m [(C≡O)], 2086w [v(C≡C)]. Positive FAB-MS: m/z: 2405 {M-2PF<sub>6</sub>}<sup>2+</sup>. Anal. Calc. for Ag<sub>6</sub>Re<sub>4</sub>C<sub>176</sub>H<sub>112</sub>N<sub>8</sub>O<sub>12</sub>Br<sub>8</sub>P<sub>10</sub>F<sub>12</sub>: C, 41.45; H, 2.21; N, 2.20. Found: C, 41.45; H, 2.41; N, 2.20.

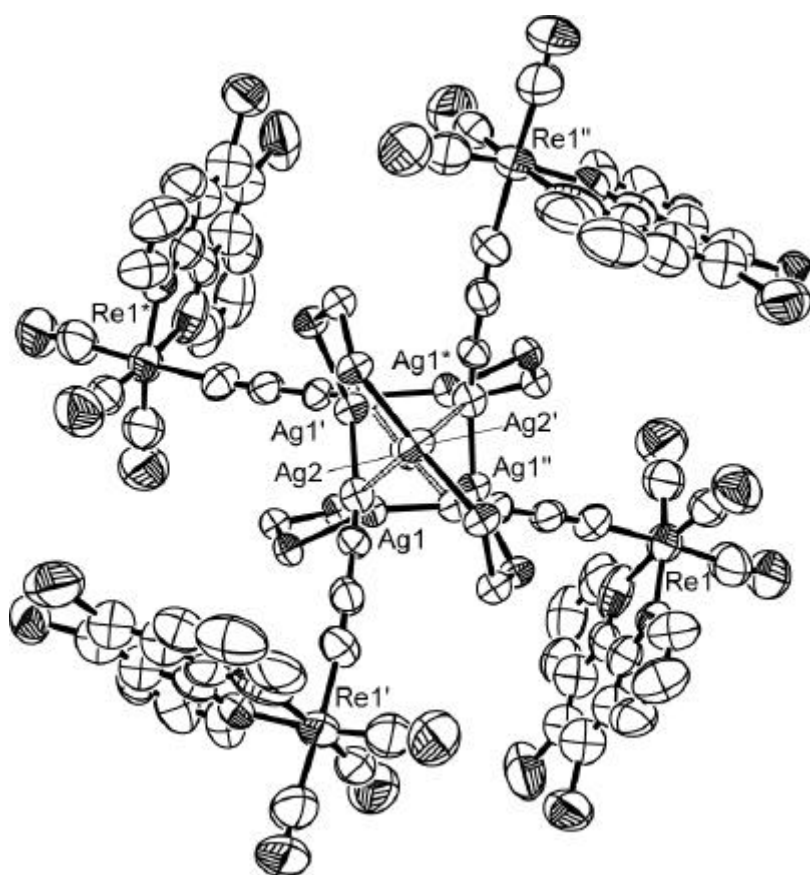

Perspective drawing of the complex cation of **4** with atomic numbering scheme. Hydrogen atoms and phenyl rings have been omitted for clarity. Thermal ellipsoids are shown at the 30% probability level.

**Crystal data:** [C<sub>176</sub> H<sub>136</sub> Ag<sub>6</sub> F<sub>12</sub> N<sub>8</sub> O<sub>12</sub> P<sub>10</sub> Re<sub>4</sub>] (2) ; formula weight = 4484.65, Orthorhombic, P 2<sub>1</sub> 2<sub>1</sub> 2<sub>1</sub>, a = 20.082(4) Å, b = 29.961(6) Å, c = 35.827(7) Å, V = 21556(7) Å<sup>3</sup>, Z = 4, D<sub>c</sub> = 1.382 g cm<sup>-3</sup>, μ(Mo-Kα) = 2.901 mm<sup>-1</sup>, F(000) = 8736, T = 293 K.

**Data collection:** A crystal of dimensions 0.3 x 0.1 x 0.05 mm mounted in a glass capillary with mother liquor was used for data collection at 20°C on a MAR diffractometer with a 300 mm image plate detector using graphite monochromatized Mo-K<sub>α</sub> radiation (λ = 0.71073 Å). Data collection was made with 1.5° oscillation step of φ, 600 seconds exposure time and scanner distance at 140 mm. 120 images were collected.

**Data reduction:** The images were interpreted and intensities integrated using program DENZO<sup>1</sup>.

**Structure solution:** The structure was solved by direct methods employing SIR-97 program<sup>2</sup> on PC. Ag, Re and P atoms were located according to the direct methods and the successive least-square Fourier cycles. Positions of other non-hydrogen atoms were found after successful refinement by full-matrix least-squares using program SHELXL-97<sup>3</sup> on PC. Two PF<sub>6</sub><sup>-</sup> anions were located; and for convergence of refinement, the geometry of the anions was assumed to be normal octahedral with the same P-F and adjacent F...F distances; and thermal parameters of each six F atoms were assumed to be the same. Since some Re atoms have high thermal parameters, restraints had to be applied for the coordinated organic ligands. Pyridine rings of bpy ligand were assumed to be normal hexagon rings with bond lengths of 1.39 Å. For each Re(CO)<sub>3</sub>(bpy)-fragment, Re-CO bond lengths and distances of Re...O were assumed to be similar; three Re(4)-CO bond lengths were extraordinarily assumed to be around 1.90(2) Å; C atoms of each three carbonyls were assumed to be similarly separated; for Re(3) and Re(4), four groups of planarity were assumed for two CO's, Re and bound C of C<sub>4</sub>; planarity of bpy and Re(4) was also assumed; for the four bpy(Me)<sub>2</sub>-ligands, all the C-Me bond lengths and N...N distances were assumed to be similar; and the C-C bonds connecting two py rings were also assumed to be similar; thermal parameters of C and O atoms of the three CO's bound to Re(4) were assumed to be the same respectively. The absolute structure was assisted by the Flack parameter of 0.005(9).

**Structure refinement:** According to the SHELXL-97 program<sup>3</sup>, all 18181 independent reflections (R<sub>int</sub><sup>4</sup> equal to 0.0553, 11341 reflections larger than 4σ(F<sub>o</sub>)) from a total 41373 reflections were participated in the full-matrix least-square refinement against F<sup>2</sup>. These reflections were in the range -21 ≤ h ≤ 20, -29 ≤ k ≤ 28, -37 ≤ l ≤ 26 with 2θ<sub>max</sub> equal to 45.44°.

One crystallographic asymmetric unit consists of one formula unit. In the final stage of least-squares refinement, only Ag, Re, P atoms were refined anisotropically, other non-hydrogen atoms isotropically. H atoms were generated by program SHELXL-97. The positions of H atoms were calculated based on riding mode with thermal parameters equal to 1.2 times that of the associated C atoms, and participated in the calculation of final R-indices<sup>5</sup>.

Convergence ((Δσ)<sub>max</sub> = 0.06, av. 0.006) for 711 variable parameters by full-matrix least-squares refinement on F<sup>2</sup> reaches to R<sub>1</sub> = 0.0683 and wR<sub>2</sub> = 0.1819 with a goodness-of-fit of 0.996, the parameters a and b for weighting scheme are 0.1164 and 0. The final difference Fourier map shows maximum rest peaks and holes of 1.214 and -1.261 eÅ<sup>-3</sup> respectively.

**Drawing:** The ORTEP<sup>6</sup> drawing of the molecule was made with thermal ellipsoids at the 30 % probability level. Screen drawing is provided for reference. Drawing with high quality can be provided upon request.

**Tables:** Table (1) of Crystallographic and refinement data, table (2) of atomic coordinates, table (3) of full bond lengths and bond angles and this report<sup>7</sup> are provided. The other supplementary materials, such as table of

<sup>1</sup> Otwinowski, Z. and Minor, W., "Processing of X-ray Diffraction Data Collected in Oscillation Mode", Methods in Enzymology, Volume 276: Macromolecular Crystallography, part A, p. 307-326, 1997. Carter C. W., Sweet Jr. & R. M., Eds., Academic Press.

<sup>2</sup> A. Altomare, M. C. Burla, M. Camalli, G. Cascarano, C. Giacovazzo, A. Guagliardi, A.G.G. Moliterni, G. Polidori, R. Spagna. *Sir97: a new tool for crystal structure determination and refinement*. *J. Appl. Cryst.*, **1998**, 32, 115-119.

<sup>3</sup> SHELXL97, Sheldrick, G. M. (1997). SHELX97. Programs for Crystal Structure Analysis (Release 97-2). University of Goettingen, Germany.

<sup>4</sup>  $R_{int} = \sum |F_o^2 - F_o^2(\text{mean})| / \sum [F_o^2]$

<sup>5</sup> Since the structure refinements are against F<sup>2</sup>, R-indices based on F<sup>2</sup> are larger than (more than double) those based on F. For comparison with older refinements based on F and an OMIT threshold, a conventional index R<sub>1</sub> based on observed F values larger than 4σ(F<sub>o</sub>) is also given (corresponding to Intensity ≥ 2σ(I)).  $wR_2 = \{ \sum [w(F_o^2 - F_c^2)^2] / \sum [w(F_o^2)] \}^{1/2}$ ,  $R_1 = \sum ||F_o| - |F_c|| / \sum |F_o|$ , The Goodness of Fit is always based on F<sup>2</sup>:  $GoF = S = \{ \sum [w(F_o^2 - F_c^2)^2] / (n - p) \}^{1/2}$ , where n is the number of reflections and p is the total number of parameters refined. The weighting scheme is:  $w = 1 / [\sigma^2(F_o^2) + (aP)^2 + bP]$ , where P is  $[2F_c^2 + \text{Max}(F_o^2, 0)] / 3$ .

<sup>6</sup> ORTEP3 for Windows - Farrugia, L. J. (1997) *J. Appl. Cryst.* 30, 565.

anisotropic displacement parameters, table of hydrogen coordinates and/or other tables and/or CIF, RES-files, can be provided under request by notifying the identification code.

---

<sup>7</sup> Crystallographic data summarized in this report are abstracted from tables of crystallographic data and data collection record.

Table 1. Crystal data and structure refinement for mar499.

|                                   |                                                                                                                                  |          |
|-----------------------------------|----------------------------------------------------------------------------------------------------------------------------------|----------|
| Identification code               | mar499                                                                                                                           |          |
| Empirical formula                 | C <sub>176</sub> H <sub>136</sub> Ag <sub>6</sub> F <sub>12</sub> N <sub>8</sub> O <sub>12</sub> P <sub>10</sub> Re <sub>4</sub> |          |
| Formula weight                    | 4484.65                                                                                                                          |          |
| Temperature                       | 293(2) K                                                                                                                         |          |
| Wavelength                        | 0.71073 Å                                                                                                                        |          |
| Crystal system                    | Orthorhombic                                                                                                                     |          |
| Space group                       | P 2 <sub>1</sub> 2 <sub>1</sub> 2 <sub>1</sub>                                                                                   |          |
| Unit cell dimensions              | a = 20.082(4) Å                                                                                                                  | α = 90°. |
|                                   | b = 29.961(6) Å                                                                                                                  | β = 90°. |
|                                   | c = 35.827(7) Å                                                                                                                  | γ = 90°. |
| Volume                            | 21556(7) Å <sup>3</sup>                                                                                                          |          |
| Z                                 | 4                                                                                                                                |          |
| Density (calculated)              | 1.382 Mg/m <sup>3</sup>                                                                                                          |          |
| Absorption coefficient            | 2.901 mm <sup>-1</sup>                                                                                                           |          |
| F(000)                            | 8736                                                                                                                             |          |
| Crystal size                      | 0.3 x 0.1 x 0.05 mm <sup>3</sup>                                                                                                 |          |
| Theta range for data collection   | 0.89 to 22.72°.                                                                                                                  |          |
| Index ranges                      | -21 ≤ h ≤ 20, -29 ≤ k ≤ 28, -37 ≤ l ≤ 26                                                                                         |          |
| Reflections collected             | 41373                                                                                                                            |          |
| Independent reflections           | 18181 [R(int) = 0.0553]                                                                                                          |          |
| Completeness to theta = 22.72°    | 69.0 %                                                                                                                           |          |
| Absorption correction             | None                                                                                                                             |          |
| Refinement method                 | Full-matrix least-squares on F <sup>2</sup>                                                                                      |          |
| Data / restraints / parameters    | 18181 / 295 / 711                                                                                                                |          |
| Goodness-of-fit on F <sup>2</sup> | 0.996                                                                                                                            |          |
| Final R indices [I > 2σ(I)]       | R1 = 0.0683, wR2 = 0.1819                                                                                                        |          |
| R indices (all data)              | R1 = 0.1131, wR2 = 0.2123                                                                                                        |          |
| Absolute structure parameter      | 0.005(9)                                                                                                                         |          |
| Largest diff. peak and hole       | 1.214 and -1.261 e.Å <sup>-3</sup>                                                                                               |          |

Table 2. Atomic coordinates ( $\times 10^4$ ) and equivalent isotropic displacement parameters ( $\text{\AA}^2 \times 10^3$ ) for mar499.  $U(\text{eq})$  is defined as one third of the trace of the orthogonalized  $U^{ij}$  tensor.

|       | x         | y        | z        | $U(\text{eq})$ |
|-------|-----------|----------|----------|----------------|
| Ag(1) | 875(1)    | 4137(1)  | 1664(1)  | 81(1)          |
| Ag(2) | 1107(1)   | 3583(1)  | 2329(1)  | 76(1)          |
| Ag(3) | 1516(1)   | 3303(1)  | 1415(1)  | 83(1)          |
| Ag(4) | 865(1)    | 2698(1)  | 1976(1)  | 83(1)          |
| Ag(5) | 2392(1)   | 3199(1)  | 2086(1)  | 79(1)          |
| Ag(6) | 2099(1)   | 2254(1)  | 2246(1)  | 90(1)          |
| Re(2) | -2383(1)  | 3155(1)  | 1354(1)  | 105(1)         |
| Re(1) | 3694(1)   | 5429(1)  | 2002(1)  | 148(1)         |
| Re(3) | 3441(1)   | 1578(1)  | 554(1)   | 159(1)         |
| Re(4) | 1180(1)   | 2555(1)  | 4133(1)  | 186(1)         |
| P(1)  | 639(3)    | 4737(2)  | 2116(2)  | 78(2)          |
| P(2)  | 1311(3)   | 4218(2)  | 2743(2)  | 78(2)          |
| P(3)  | 552(3)    | 4215(2)  | 1012(2)  | 87(2)          |
| P(4)  | 859(3)    | 3244(2)  | 839(2)   | 86(2)          |
| P(5)  | 3527(3)   | 3056(2)  | 1867(2)  | 89(2)          |
| P(6)  | 3322(3)   | 2141(2)  | 2224(3)  | 102(2)         |
| P(7)  | 113(3)    | 2271(2)  | 2377(2)  | 87(2)          |
| P(8)  | 1325(3)   | 1657(2)  | 2435(2)  | 90(2)          |
| O(1)  | 4565(13)  | 6257(8)  | 2049(10) | 211(11)        |
| O(2)  | 2631(13)  | 6004(9)  | 2362(10) | 225(12)        |
| O(3)  | 4316(17)  | 5116(12) | 2726(9)  | 280(17)        |
| O(4)  | -3863(8)  | 3006(7)  | 1195(7)  | 153(7)         |
| O(5)  | -2193(11) | 3673(8)  | 626(6)   | 171(8)         |
| O(6)  | -2105(9)  | 2267(6)  | 962(7)   | 147(7)         |
| O(7)  | 4176(10)  | 1058(7)  | -52(6)   | 181(9)         |
| O(8)  | 4575(15)  | 1337(12) | 1061(11) | 283(17)        |
| O(9)  | 4330(20)  | 2343(13) | 367(18)  | 390(30)        |
| O(10) | 930(20)   | 2441(14) | 4960(7)  | 312(11)        |
| O(11) | 669(19)   | 1629(9)  | 3956(15) | 312(11)        |
| O(12) | -188(14)  | 2960(12) | 4045(16) | 312(11)        |
| C(1)  | 627(7)    | 5305(4)  | 1926(5)  | 72(6)          |

|       |          |         |         |         |
|-------|----------|---------|---------|---------|
| C(2)  | 1223(6)  | 5515(6) | 1836(6) | 148(11) |
| C(3)  | 1216(7)  | 5935(6) | 1671(7) | 152(12) |
| C(4)  | 614(10)  | 6144(5) | 1595(6) | 143(11) |
| C(5)  | 18(7)    | 5934(5) | 1686(6) | 109(8)  |
| C(6)  | 25(6)    | 5514(5) | 1851(5) | 98(8)   |
| C(7)  | -185(6)  | 4686(5) | 2339(5) | 79(6)   |
| C(8)  | -620(7)  | 4374(5) | 2188(4) | 101(8)  |
| C(9)  | -1229(7) | 4292(5) | 2359(5) | 98(7)   |
| C(10) | -1403(6) | 4522(6) | 2682(5) | 126(9)  |
| C(11) | -968(8)  | 4835(5) | 2833(4) | 120(9)  |
| C(12) | -359(7)  | 4916(4) | 2662(5) | 90(7)   |
| C(13) | 2111(7)  | 4231(6) | 2981(6) | 86(7)   |
| C(14) | 2281(9)  | 3855(5) | 3188(6) | 135(10) |
| C(15) | 2883(11) | 3841(6) | 3379(6) | 150(12) |
| C(16) | 3315(8)  | 4203(8) | 3363(7) | 149(12) |
| C(17) | 3145(9)  | 4579(6) | 3156(7) | 181(15) |
| C(18) | 2543(10) | 4593(5) | 2965(6) | 156(12) |
| C(19) | 750(8)   | 4280(6) | 3131(5) | 92(7)   |
| C(20) | 240(9)   | 3969(5) | 3173(6) | 122(9)  |
| C(21) | -197(8)  | 4003(7) | 3472(7) | 179(14) |
| C(22) | -126(10) | 4347(8) | 3729(6) | 178(15) |
| C(23) | 383(11)  | 4657(6) | 3687(5) | 160(12) |
| C(24) | 821(8)   | 4624(5) | 3388(6) | 108(8)  |
| C(25) | 1227(9)  | 4764(6) | 2466(7) | 74(6)   |
| C(26) | 1197(9)  | 4408(6) | 689(7)  | 115(9)  |
| C(27) | 1838(11) | 4488(6) | 820(6)  | 129(10) |
| C(28) | 2345(8)  | 4593(7) | 571(8)  | 191(15) |
| C(29) | 2211(11) | 4617(7) | 191(7)  | 157(12) |
| C(30) | 1571(13) | 4537(7) | 60(6)   | 171(14) |
| C(31) | 1064(9)  | 4433(6) | 309(7)  | 142(11) |
| C(32) | -164(9)  | 4611(6) | 944(7)  | 100(8)  |
| C(33) | -19(8)   | 5057(7) | 874(8)  | 143(11) |
| C(34) | -531(11) | 5368(5) | 849(8)  | 138(10) |
| C(35) | -1188(9) | 5233(7) | 896(8)  | 145(11) |
| C(36) | -1333(8) | 4787(8) | 967(9)  | 189(15) |
| C(37) | -821(11) | 4476(5) | 991(8)  | 172(14) |



|       |          |          |          |         |
|-------|----------|----------|----------|---------|
| C(38) | 1310(9)  | 3285(6)  | 384(5)   | 103(8)  |
| C(39) | 963(7)   | 3260(6)  | 48(7)    | 139(11) |
| C(40) | 1305(11) | 3283(7)  | -288(5)  | 182(15) |
| C(41) | 1993(11) | 3332(6)  | -290(5)  | 136(11) |
| C(42) | 2340(7)  | 3358(6)  | 45(7)    | 146(11) |
| C(43) | 1998(9)  | 3334(6)  | 382(5)   | 131(10) |
| C(44) | 375(9)   | 2722(5)  | 763(7)   | 107(8)  |
| C(45) | -291(9)  | 2734(5)  | 659(7)   | 132(10) |
| C(46) | -631(7)  | 2338(7)  | 590(8)   | 166(13) |
| C(47) | -305(10) | 1931(6)  | 626(8)   | 140(11) |
| C(48) | 361(10)  | 1920(5)  | 730(7)   | 146(11) |
| C(49) | 702(7)   | 2315(7)  | 799(7)   | 122(9)  |
| C(50) | 236(10)  | 3703(7)  | 808(8)   | 94(7)   |
| C(51) | 4198(7)  | 3318(6)  | 2126(5)  | 88(7)   |
| C(52) | 4864(9)  | 3239(6)  | 2042(5)  | 126(9)  |
| C(53) | 5361(6)  | 3415(7)  | 2268(7)  | 134(10) |
| C(54) | 5193(10) | 3670(7)  | 2578(6)  | 181(15) |
| C(55) | 4528(12) | 3749(7)  | 2663(5)  | 184(15) |
| C(56) | 4030(8)  | 3573(6)  | 2437(6)  | 128(10) |
| C(57) | 3687(8)  | 3262(6)  | 1401(6)  | 82(6)   |
| C(58) | 3837(12) | 2984(5)  | 1102(8)  | 260(20) |
| C(59) | 3947(15) | 3165(10) | 750(7)   | 420(50) |
| C(60) | 3907(13) | 3624(11) | 697(6)   | 222(19) |
| C(61) | 3756(10) | 3902(6)  | 996(8)   | 153(12) |
| C(62) | 3646(8)  | 3721(6)  | 1348(7)  | 126(9)  |
| C(63) | 3710(13) | 2310(6)  | 2659(7)  | 127(10) |
| C(64) | 4398(12) | 2358(8)  | 2682(7)  | 164(13) |
| C(65) | 4689(10) | 2511(9)  | 3009(9)  | 290(30) |
| C(66) | 4293(16) | 2618(8)  | 3315(7)  | 198(17) |
| C(67) | 3605(15) | 2570(7)  | 3293(7)  | 182(15) |
| C(68) | 3314(9)  | 2417(8)  | 2965(9)  | 191(15) |
| C(69) | 3522(13) | 1546(7)  | 2125(8)  | 119(9)  |
| C(70) | 4124(11) | 1385(9)  | 1990(9)  | 176(14) |
| C(71) | 4220(15) | 928(11)  | 1951(11) | 260(20) |
| C(72) | 3710(20) | 633(6)   | 2046(12) | 260(20) |
| C(73) | 3112(18) | 794(10)  | 2181(12) | 310(30) |

|        |           |          |          |         |
|--------|-----------|----------|----------|---------|
| C(74)  | 3016(12)  | 1251(11) | 2221(10) | 300(30) |
| C(75)  | 3743(10)  | 2450(6)  | 1841(7)  | 83(7)   |
| C(76)  | -402(8)   | 2562(6)  | 2728(6)  | 105(8)  |
| C(77)  | -516(10)  | 2386(5)  | 3081(7)  | 176(14) |
| C(78)  | -942(11)  | 2603(7)  | 3327(5)  | 164(13) |
| C(79)  | -1254(8)  | 2997(7)  | 3220(6)  | 130(10) |
| C(80)  | -1140(8)  | 3173(5)  | 2867(6)  | 124(9)  |
| C(81)  | -714(9)   | 2956(6)  | 2621(5)  | 111(9)  |
| C(82)  | -503(7)   | 1915(5)  | 2121(6)  | 88(7)   |
| C(83)  | -895(9)   | 1599(6)  | 2301(5)  | 143(11) |
| C(84)  | -1341(8)  | 1341(5)  | 2097(7)  | 131(10) |
| C(85)  | -1396(8)  | 1400(6)  | 1713(7)  | 156(12) |
| C(86)  | -1005(10) | 1716(7)  | 1533(5)  | 143(11) |
| C(87)  | -558(8)   | 1974(5)  | 1737(6)  | 108(8)  |
| C(88)  | 1624(8)   | 1256(6)  | 2783(5)  | 99(8)   |
| C(89)  | 1844(9)   | 1423(5)  | 3123(6)  | 126(10) |
| C(90)  | 2065(9)   | 1132(8)  | 3399(5)  | 163(13) |
| C(91)  | 2066(9)   | 674(7)   | 3334(6)  | 158(12) |
| C(92)  | 1846(8)   | 508(4)   | 2994(6)  | 117(9)  |
| C(93)  | 1626(8)   | 799(6)   | 2718(5)  | 105(8)  |
| C(94)  | 1045(8)   | 1322(5)  | 2048(5)  | 88(7)   |
| C(95)  | 472(8)    | 1062(6)  | 2053(5)  | 121(9)  |
| C(96)  | 271(8)    | 840(5)   | 1731(7)  | 133(10) |
| C(97)  | 643(11)   | 878(6)   | 1406(5)  | 150(12) |
| C(98)  | 1216(10)  | 1138(7)  | 1401(5)  | 167(13) |
| C(99)  | 1417(7)   | 1360(5)  | 1723(6)  | 137(10) |
| C(100) | 534(10)   | 1870(8)  | 2673(8)  | 100(7)  |
| C(101) | 2032(9)   | 3848(7)  | 1734(7)  | 72(6)   |
| C(102) | 2309(9)   | 4169(7)  | 1791(7)  | 69(6)   |
| C(103) | 2711(13)  | 4549(9)  | 1876(10) | 118(9)  |
| C(104) | 3089(12)  | 4893(8)  | 1961(9)  | 105(8)  |
| C(105) | 4240(15)  | 5931(9)  | 2069(13) | 198(17) |
| C(106) | 3065(15)  | 5760(9)  | 2270(10) | 167(14) |
| C(107) | 4004(14)  | 5272(11) | 2480(9)  | 171(14) |
| N(1)   | 3512(8)   | 5550(5)  | 1443(5)  | 111(6)  |
| C(108) | 3010(8)   | 5832(5)  | 1318(6)  | 149(12) |

|        |           |          |          |         |
|--------|-----------|----------|----------|---------|
| C(109) | 2922(9)   | 5903(6)  | 938(7)   | 176(14) |
| C(110) | 3337(12)  | 5692(8)  | 682(5)   | 177(14) |
| C(111) | 3839(10)  | 5409(7)  | 807(6)   | 158(12) |
| C(112) | 3926(7)   | 5338(5)  | 1187(7)  | 121(9)  |
| N(2)   | 4404(7)   | 5008(5)  | 1692(6)  | 136(8)  |
| C(113) | 4373(7)   | 5033(5)  | 1305(6)  | 99(8)   |
| C(114) | 4771(9)   | 4755(6)  | 1089(5)  | 118(9)  |
| C(115) | 5198(8)   | 4452(5)  | 1259(6)  | 149(12) |
| C(116) | 5229(7)   | 4428(5)  | 1646(7)  | 123(9)  |
| C(117) | 4831(9)   | 4705(6)  | 1863(5)  | 142(11) |
| C(118) | 3220(20)  | 5828(15) | 262(8)   | 250(20) |
| C(119) | 5538(17)  | 4112(11) | 985(11)  | 197(16) |
| C(120) | 387(10)   | 3449(6)  | 1904(7)  | 78(6)   |
| C(121) | -172(9)   | 3372(6)  | 1747(7)  | 70(6)   |
| C(122) | -815(11)  | 3323(7)  | 1622(8)  | 90(7)   |
| C(123) | -1438(12) | 3256(8)  | 1516(8)  | 102(8)  |
| C(124) | -3285(10) | 3069(7)  | 1246(8)  | 105(8)  |
| C(125) | -2257(12) | 3463(8)  | 907(7)   | 138(11) |
| C(126) | -2190(11) | 2615(7)  | 1103(8)  | 126(10) |
| N(3)   | -2470(7)  | 2883(5)  | 1905(4)  | 101(6)  |
| C(127) | -2337(7)  | 2441(4)  | 1996(5)  | 122(9)  |
| C(128) | -2446(9)  | 2289(4)  | 2357(6)  | 142(11) |
| C(129) | -2688(9)  | 2580(7)  | 2628(4)  | 155(12) |
| C(130) | -2821(8)  | 3022(6)  | 2537(5)  | 112(9)  |
| C(131) | -2712(7)  | 3174(4)  | 2175(5)  | 89(7)   |
| N(4)   | -2623(6)  | 3705(4)  | 1713(4)  | 91(5)   |
| C(132) | -2752(7)  | 3605(4)  | 2085(5)  | 87(7)   |
| C(133) | -2976(7)  | 3937(6)  | 2326(4)  | 100(8)  |
| C(134) | -3071(7)  | 4368(5)  | 2194(5)  | 114(9)  |
| C(135) | -2942(8)  | 4469(3)  | 1823(5)  | 122(9)  |
| C(136) | -2718(7)  | 4137(5)  | 1582(4)  | 102(8)  |
| C(137) | -2840(20) | 2369(14) | 3015(9)  | 224(19) |
| C(138) | -3295(15) | 4757(9)  | 2454(10) | 158(12) |
| C(139) | 1698(10)  | 2555(7)  | 1615(8)  | 83(7)   |
| C(140) | 2089(11)  | 2368(7)  | 1408(8)  | 88(7)   |
| C(141) | 2523(12)  | 2139(8)  | 1161(8)  | 98(8)   |

|        |          |          |          |         |
|--------|----------|----------|----------|---------|
| C(142) | 2924(14) | 1888(10) | 948(11)  | 126(10) |
| C(143) | 3901(8)  | 1256(5)  | 177(5)   | 213(18) |
| C(144) | 4257(16) | 1527(12) | 838(12)  | 250(20) |
| C(145) | 3860(20) | 2102(11) | 346(9)   | 450(50) |
| N(5)   | 2537(6)  | 1657(6)  | 229(5)   | 117(7)  |
| C(146) | 2411(8)  | 2042(5)  | 24(6)    | 151(12) |
| C(147) | 1789(10) | 2109(6)  | -136(6)  | 154(12) |
| C(148) | 1292(7)  | 1790(7)  | -92(6)   | 136(10) |
| C(149) | 1417(8)  | 1405(6)  | 113(6)   | 140(11) |
| C(150) | 2040(9)  | 1339(5)  | 273(6)   | 118(9)  |
| N(6)   | 2811(7)  | 1032(5)  | 695(5)   | 120(7)  |
| C(151) | 2219(8)  | 992(5)   | 498(5)   | 99(8)   |
| C(152) | 1809(7)  | 624(6)   | 555(6)   | 125(10) |
| C(153) | 1992(10) | 297(5)   | 811(7)   | 150(12) |
| C(154) | 2585(11) | 337(6)   | 1008(6)  | 173(14) |
| C(155) | 2995(8)  | 705(6)   | 950(5)   | 157(12) |
| C(156) | 606(14)  | 1797(13) | -295(12) | 199(16) |
| C(157) | 1537(19) | -112(11) | 881(16)  | 230(20) |
| C(158) | 1782(10) | 2979(7)  | 2556(9)  | 83(7)   |
| C(159) | 1666(10) | 2858(7)  | 2859(9)  | 83(7)   |
| C(160) | 1543(13) | 2746(9)  | 3208(11) | 109(8)  |
| C(161) | 1402(14) | 2673(10) | 3529(12) | 140(11) |
| C(162) | 994(13)  | 2453(9)  | 4648(4)  | 350(20) |
| C(163) | 950(30)  | 1948(6)  | 4024(14) | 350(20) |
| C(164) | 261(12)  | 2723(17) | 4059(15) | 350(20) |
| N(7)   | 1596(11) | 3201(5)  | 4206(7)  | 184(12) |
| C(165) | 1249(8)  | 3602(7)  | 4191(10) | 184(15) |
| C(166) | 1589(12) | 4004(5)  | 4224(8)  | 191(16) |
| C(167) | 2276(12) | 4005(6)  | 4270(8)  | 169(14) |
| C(168) | 2623(8)  | 3604(8)  | 4284(8)  | 156(12) |
| C(169) | 2283(11) | 3202(6)  | 4252(5)  | 156(12) |
| N(8)   | 2145(8)  | 2434(8)  | 4222(8)  | 189(13) |
| C(170) | 2545(14) | 2793(6)  | 4322(9)  | 188(15) |
| C(171) | 3222(13) | 2730(9)  | 4382(11) | 260(20) |
| C(172) | 3499(9)  | 2308(11) | 4342(11) | 270(30) |
| C(173) | 3100(13) | 1949(8)  | 4242(11) | 210(18) |

|        |           |          |          |         |
|--------|-----------|----------|----------|---------|
| C(174) | 2422(13)  | 2012(7)  | 4182(10) | 310(30) |
| C(175) | 2590(20)  | 4476(11) | 4353(18) | 290(30) |
| C(176) | 4234(18)  | 2140(20) | 4410(30) | 450(50) |
| P(9)   | -2938(7)  | 3976(5)  | 3499(4)  | 270(9)  |
| F(1)   | -3523(12) | 3974(9)  | 3241(7)  | 318(7)  |
| F(2)   | -3099(13) | 3515(7)  | 3615(8)  | 318(7)  |
| F(3)   | -2350(12) | 3973(9)  | 3750(7)  | 318(7)  |
| F(4)   | -2777(13) | 4441(7)  | 3375(8)  | 318(7)  |
| F(5)   | -3355(13) | 4156(9)  | 3801(7)  | 318(7)  |
| F(6)   | -2510(13) | 3801(9)  | 3191(7)  | 318(7)  |
| P(10)  | 4541(7)   | 4582(5)  | -220(4)  | 239(8)  |
| F(7)   | 4039(17)  | 4934(11) | -396(12) | 450(14) |
| F(8)   | 5062(17)  | 4960(11) | -139(12) | 450(14) |
| F(9)   | 5018(17)  | 4215(11) | -41(12)  | 450(14) |
| F(10)  | 3993(16)  | 4194(11) | -301(12) | 450(14) |
| F(11)  | 4850(20)  | 4490(14) | -620(8)  | 450(14) |
| F(12)  | 4210(20)  | 4651(14) | 179(8)   | 450(14) |

---

Table 3. Bond lengths [Å] and angles [°] for mar499.

|              |           |              |           |
|--------------|-----------|--------------|-----------|
| Ag(1)-P(3)   | 2.438(8)  | Re(1)-C(106) | 1.87(3)   |
| Ag(1)-C(120) | 2.44(2)   | Re(1)-C(105) | 1.88(3)   |
| Ag(1)-P(1)   | 2.466(7)  | Re(1)-C(107) | 1.88(3)   |
| Ag(1)-C(101) | 2.492(18) | Re(1)-C(104) | 2.02(3)   |
| Ag(1)-Ag(2)  | 2.940(3)  | Re(1)-N(1)   | 2.070(18) |
| Ag(1)-Ag(3)  | 2.949(2)  | Re(1)-N(2)   | 2.202(13) |
| Ag(2)-C(120) | 2.14(2)   | Re(3)-C(143) | 1.901(18) |
| Ag(2)-C(158) | 2.40(2)   | Re(3)-C(145) | 1.929(19) |
| Ag(2)-P(2)   | 2.447(6)  | Re(3)-C(144) | 1.935(18) |
| Ag(2)-Ag(5)  | 2.957(2)  | Re(3)-C(142) | 1.98(3)   |
| Ag(2)-Ag(4)  | 2.978(2)  | Re(3)-N(6)   | 2.128(12) |
| Ag(3)-C(101) | 2.25(2)   | Re(3)-N(5)   | 2.171(13) |
| Ag(3)-C(139) | 2.38(2)   | Re(4)-C(162) | 1.907(14) |
| Ag(3)-P(4)   | 2.456(7)  | Re(4)-C(163) | 1.915(14) |
| Ag(3)-Ag(5)  | 2.996(3)  | Re(4)-C(164) | 1.931(14) |
| Ag(3)-Ag(4)  | 3.007(3)  | Re(4)-N(8)   | 1.996(15) |
| Ag(4)-C(139) | 2.16(2)   | Re(4)-N(7)   | 2.125(14) |
| Ag(4)-P(7)   | 2.444(7)  | Re(4)-C(161) | 2.24(4)   |
| Ag(4)-C(120) | 2.459(19) | P(1)-C(25)   | 1.72(2)   |
| Ag(4)-Ag(6)  | 2.974(2)  | P(1)-C(1)    | 1.831(14) |
| Ag(5)-C(158) | 2.19(3)   | P(1)-C(7)    | 1.843(13) |
| Ag(5)-C(101) | 2.43(2)   | P(2)-C(19)   | 1.800(17) |
| Ag(5)-P(5)   | 2.449(6)  | P(2)-C(13)   | 1.819(15) |
| Ag(5)-Ag(6)  | 2.948(2)  | P(2)-C(25)   | 1.92(2)   |
| Ag(6)-P(8)   | 2.464(6)  | P(3)-C(50)   | 1.81(2)   |
| Ag(6)-P(6)   | 2.480(6)  | P(3)-C(26)   | 1.829(18) |
| Ag(6)-C(158) | 2.52(2)   | P(3)-C(32)   | 1.879(16) |
| Ag(6)-C(139) | 2.56(3)   | P(4)-C(44)   | 1.859(15) |
| Re(2)-C(125) | 1.87(2)   | P(4)-C(50)   | 1.86(2)   |
| Re(2)-C(124) | 1.87(2)   | P(4)-C(38)   | 1.870(18) |
| Re(2)-C(126) | 1.89(2)   | P(5)-C(57)   | 1.81(2)   |
| Re(2)-C(123) | 2.01(2)   | P(5)-C(51)   | 1.815(16) |
| Re(2)-N(3)   | 2.141(14) | P(5)-C(75)   | 1.87(2)   |
| Re(2)-N(4)   | 2.145(11) | P(6)-C(63)   | 1.82(2)   |

|              |           |             |        |
|--------------|-----------|-------------|--------|
| P(6)-C(75)   | 1.86(2)   | C(16)-C(17) | 1.3900 |
| P(6)-C(69)   | 1.86(2)   | C(17)-C(18) | 1.3900 |
| P(7)-C(100)  | 1.81(3)   | C(19)-C(20) | 1.3900 |
| P(7)-C(76)   | 1.847(17) | C(19)-C(24) | 1.3900 |
| P(7)-C(82)   | 1.874(15) | C(20)-C(21) | 1.3900 |
| P(8)-C(94)   | 1.801(17) | C(21)-C(22) | 1.3900 |
| P(8)-C(88)   | 1.831(16) | C(22)-C(23) | 1.3900 |
| P(8)-C(100)  | 1.91(2)   | C(23)-C(24) | 1.3900 |
| O(1)-C(105)  | 1.18(3)   | C(26)-C(27) | 1.3900 |
| O(2)-C(106)  | 1.18(3)   | C(26)-C(31) | 1.3900 |
| O(3)-C(107)  | 1.18(3)   | C(27)-C(28) | 1.3900 |
| O(4)-C(124)  | 1.191(19) | C(28)-C(29) | 1.3900 |
| O(5)-C(125)  | 1.19(2)   | C(29)-C(30) | 1.3900 |
| O(6)-C(126)  | 1.17(2)   | C(30)-C(31) | 1.3900 |
| O(7)-C(143)  | 1.15(2)   | C(32)-C(33) | 1.3900 |
| O(8)-C(144)  | 1.17(3)   | C(32)-C(37) | 1.3900 |
| O(9)-C(145)  | 1.19(3)   | C(33)-C(34) | 1.3900 |
| O(10)-C(162) | 1.13(2)   | C(34)-C(35) | 1.3900 |
| O(11)-C(163) | 1.14(3)   | C(35)-C(36) | 1.3900 |
| O(12)-C(164) | 1.15(3)   | C(36)-C(37) | 1.3900 |
| C(1)-C(2)    | 1.3900    | C(38)-C(39) | 1.3900 |
| C(1)-C(6)    | 1.3900    | C(38)-C(43) | 1.3900 |
| C(2)-C(3)    | 1.3900    | C(39)-C(40) | 1.3900 |
| C(3)-C(4)    | 1.3900    | C(40)-C(41) | 1.3900 |
| C(4)-C(5)    | 1.3900    | C(41)-C(42) | 1.3900 |
| C(5)-C(6)    | 1.3900    | C(42)-C(43) | 1.3900 |
| C(7)-C(8)    | 1.3900    | C(44)-C(45) | 1.3900 |
| C(7)-C(12)   | 1.3900    | C(44)-C(49) | 1.3900 |
| C(8)-C(9)    | 1.3900    | C(45)-C(46) | 1.3900 |
| C(9)-C(10)   | 1.3900    | C(46)-C(47) | 1.3900 |
| C(10)-C(11)  | 1.3900    | C(47)-C(48) | 1.3900 |
| C(11)-C(12)  | 1.3900    | C(48)-C(49) | 1.3900 |
| C(13)-C(14)  | 1.3900    | C(51)-C(52) | 1.3900 |
| C(13)-C(18)  | 1.3900    | C(51)-C(56) | 1.3900 |
| C(14)-C(15)  | 1.3900    | C(52)-C(53) | 1.3900 |
| C(15)-C(16)  | 1.3900    | C(53)-C(54) | 1.3900 |

|             |        |               |           |
|-------------|--------|---------------|-----------|
| C(54)-C(55) | 1.3900 | C(91)-C(92)   | 1.3900    |
| C(55)-C(56) | 1.3900 | C(92)-C(93)   | 1.3900    |
| C(57)-C(58) | 1.3900 | C(94)-C(95)   | 1.3900    |
| C(57)-C(62) | 1.3900 | C(94)-C(99)   | 1.3900    |
| C(58)-C(59) | 1.3900 | C(95)-C(96)   | 1.3900    |
| C(59)-C(60) | 1.3900 | C(96)-C(97)   | 1.3900    |
| C(60)-C(61) | 1.3900 | C(97)-C(98)   | 1.3900    |
| C(61)-C(62) | 1.3900 | C(98)-C(99)   | 1.3900    |
| C(63)-C(64) | 1.3900 | C(101)-C(102) | 1.13(2)   |
| C(63)-C(68) | 1.3900 | C(102)-C(103) | 1.43(3)   |
| C(64)-C(65) | 1.3900 | C(103)-C(104) | 1.32(3)   |
| C(65)-C(66) | 1.3900 | N(1)-C(108)   | 1.3900    |
| C(66)-C(67) | 1.3900 | N(1)-C(112)   | 1.3900    |
| C(67)-C(68) | 1.3900 | C(108)-C(109) | 1.3900    |
| C(69)-C(70) | 1.3900 | C(109)-C(110) | 1.3900    |
| C(69)-C(74) | 1.3900 | C(110)-C(111) | 1.3900    |
| C(70)-C(71) | 1.3900 | C(110)-C(118) | 1.58(2)   |
| C(71)-C(72) | 1.3900 | C(111)-C(112) | 1.3900    |
| C(72)-C(73) | 1.3900 | C(112)-C(113) | 1.350(14) |
| C(73)-C(74) | 1.3900 | N(2)-C(113)   | 1.3900    |
| C(76)-C(77) | 1.3900 | N(2)-C(117)   | 1.3900    |
| C(76)-C(81) | 1.3900 | C(113)-C(114) | 1.3900    |
| C(77)-C(78) | 1.3900 | C(114)-C(115) | 1.3900    |
| C(78)-C(79) | 1.3900 | C(115)-C(116) | 1.3900    |
| C(79)-C(80) | 1.3900 | C(115)-C(119) | 1.57(2)   |
| C(80)-C(81) | 1.3900 | C(116)-C(117) | 1.3900    |
| C(82)-C(83) | 1.3900 | C(120)-C(121) | 1.28(3)   |
| C(82)-C(87) | 1.3900 | C(121)-C(122) | 1.37(3)   |
| C(83)-C(84) | 1.3900 | C(122)-C(123) | 1.32(3)   |
| C(84)-C(85) | 1.3900 | N(3)-C(127)   | 1.3900    |
| C(85)-C(86) | 1.3900 | N(3)-C(131)   | 1.3900    |
| C(86)-C(87) | 1.3900 | C(127)-C(128) | 1.3900    |
| C(88)-C(89) | 1.3900 | C(128)-C(129) | 1.3900    |
| C(88)-C(93) | 1.3900 | C(129)-C(130) | 1.3900    |
| C(89)-C(90) | 1.3900 | C(129)-C(137) | 1.55(2)   |
| C(90)-C(91) | 1.3900 | C(130)-C(131) | 1.3900    |



|               |           |                     |            |
|---------------|-----------|---------------------|------------|
| C(131)-C(132) | 1.334(12) | C(169)-C(170)       | 1.356(15)  |
| N(4)-C(132)   | 1.3900    | N(8)-C(170)         | 1.3900     |
| N(4)-C(136)   | 1.3900    | N(8)-C(174)         | 1.3900     |
| C(132)-C(133) | 1.3900    | C(170)-C(171)       | 1.3900     |
| C(133)-C(134) | 1.3900    | C(171)-C(172)       | 1.3900     |
| C(134)-C(135) | 1.3900    | C(172)-C(173)       | 1.3900     |
| C(134)-C(138) | 1.556(19) | C(172)-C(176)       | 1.57(2)    |
| C(135)-C(136) | 1.3900    | C(173)-C(174)       | 1.3900     |
| C(139)-C(140) | 1.22(3)   | P(9)-F(5)           | 1.468(17)  |
| C(140)-C(141) | 1.42(3)   | P(9)-F(2)           | 1.479(17)  |
| C(141)-C(142) | 1.34(4)   | P(9)-F(3)           | 1.484(17)  |
| N(5)-C(146)   | 1.3900    | P(9)-F(6)           | 1.494(17)  |
| N(5)-C(150)   | 1.3900    | P(9)-F(1)           | 1.496(17)  |
| C(146)-C(147) | 1.3900    | P(9)-F(4)           | 1.496(17)  |
| C(147)-C(148) | 1.3900    | P(10)-F(8)          | 1.57(2)    |
| C(148)-C(149) | 1.3900    | P(10)-F(11)         | 1.59(2)    |
| C(148)-C(156) | 1.56(2)   | P(10)-F(7)          | 1.59(2)    |
| C(149)-C(150) | 1.3900    | P(10)-F(9)          | 1.59(2)    |
| C(150)-C(151) | 1.363(14) | P(10)-F(12)         | 1.59(2)    |
| N(6)-C(151)   | 1.3900    | P(10)-F(10)         | 1.63(2)    |
| N(6)-C(155)   | 1.3900    |                     |            |
| C(151)-C(152) | 1.3900    | P(3)-Ag(1)-C(120)   | 108.2(6)   |
| C(152)-C(153) | 1.3900    | P(3)-Ag(1)-P(1)     | 120.5(2)   |
| C(153)-C(154) | 1.3900    | C(120)-Ag(1)-P(1)   | 108.0(6)   |
| C(153)-C(157) | 1.55(2)   | P(3)-Ag(1)-C(101)   | 112.2(6)   |
| C(154)-C(155) | 1.3900    | C(120)-Ag(1)-C(101) | 92.6(7)    |
| C(158)-C(159) | 1.17(3)   | P(1)-Ag(1)-C(101)   | 111.5(6)   |
| C(159)-C(160) | 1.32(4)   | P(3)-Ag(1)-Ag(2)    | 150.89(17) |
| C(160)-C(161) | 1.20(4)   | C(120)-Ag(1)-Ag(2)  | 45.7(6)    |
| N(7)-C(165)   | 1.3900    | P(1)-Ag(1)-Ag(2)    | 84.88(17)  |
| N(7)-C(169)   | 1.3900    | C(101)-Ag(1)-Ag(2)  | 64.8(5)    |
| C(165)-C(166) | 1.3900    | P(3)-Ag(1)-Ag(3)    | 84.68(16)  |
| C(166)-C(167) | 1.3900    | C(120)-Ag(1)-Ag(3)  | 64.2(5)    |
| C(167)-C(168) | 1.3900    | P(1)-Ag(1)-Ag(3)    | 154.27(17) |
| C(167)-C(175) | 1.57(2)   | C(101)-Ag(1)-Ag(3)  | 47.9(5)    |
| C(168)-C(169) | 1.3900    | Ag(2)-Ag(1)-Ag(3)   | 72.41(7)   |

|                     |            |                     |            |
|---------------------|------------|---------------------|------------|
| C(120)-Ag(2)-C(158) | 118.8(8)   | C(139)-Ag(4)-Ag(2)  | 107.7(6)   |
| C(120)-Ag(2)-P(2)   | 133.7(5)   | P(7)-Ag(4)-Ag(2)    | 108.54(19) |
| C(158)-Ag(2)-P(2)   | 106.6(6)   | C(120)-Ag(4)-Ag(2)  | 45.1(5)    |
| C(120)-Ag(2)-Ag(1)  | 54.7(6)    | Ag(6)-Ag(4)-Ag(2)   | 97.13(7)   |
| C(158)-Ag(2)-Ag(1)  | 142.1(7)   | C(139)-Ag(4)-Ag(3)  | 51.8(6)    |
| P(2)-Ag(2)-Ag(1)    | 94.47(17)  | P(7)-Ag(4)-Ag(3)    | 167.62(18) |
| C(120)-Ag(2)-Ag(5)  | 107.9(6)   | C(120)-Ag(4)-Ag(3)  | 63.1(5)    |
| C(158)-Ag(2)-Ag(5)  | 46.7(7)    | Ag(6)-Ag(4)-Ag(3)   | 97.14(7)   |
| P(2)-Ag(2)-Ag(5)    | 109.55(14) | Ag(2)-Ag(4)-Ag(3)   | 71.07(6)   |
| Ag(1)-Ag(2)-Ag(5)   | 96.88(8)   | C(158)-Ag(5)-C(101) | 118.3(7)   |
| C(120)-Ag(2)-Ag(4)  | 54.5(5)    | C(158)-Ag(5)-P(5)   | 135.8(6)   |
| C(158)-Ag(2)-Ag(4)  | 64.2(6)    | C(101)-Ag(5)-P(5)   | 104.6(5)   |
| P(2)-Ag(2)-Ag(4)    | 167.73(19) | C(158)-Ag(5)-Ag(6)  | 56.5(6)    |
| Ag(1)-Ag(2)-Ag(4)   | 97.67(8)   | C(101)-Ag(5)-Ag(6)  | 144.1(5)   |
| Ag(5)-Ag(2)-Ag(4)   | 70.82(6)   | P(5)-Ag(5)-Ag(6)    | 94.55(16)  |
| C(101)-Ag(3)-C(139) | 117.4(8)   | C(158)-Ag(5)-Ag(2)  | 53.2(6)    |
| C(101)-Ag(3)-P(4)   | 136.7(6)   | C(101)-Ag(5)-Ag(2)  | 65.2(5)    |
| C(139)-Ag(3)-P(4)   | 105.5(6)   | P(5)-Ag(5)-Ag(2)    | 167.23(16) |
| C(101)-Ag(3)-Ag(1)  | 55.4(5)    | Ag(6)-Ag(5)-Ag(2)   | 98.17(6)   |
| C(139)-Ag(3)-Ag(1)  | 140.7(6)   | C(158)-Ag(5)-Ag(3)  | 108.7(6)   |
| P(4)-Ag(3)-Ag(1)    | 94.65(16)  | C(101)-Ag(5)-Ag(3)  | 47.5(6)    |
| C(101)-Ag(3)-Ag(5)  | 52.8(6)    | P(5)-Ag(5)-Ag(3)    | 107.9(2)   |
| C(139)-Ag(3)-Ag(5)  | 64.6(6)    | Ag(6)-Ag(5)-Ag(3)   | 97.93(7)   |
| P(4)-Ag(3)-Ag(5)    | 169.30(17) | Ag(2)-Ag(5)-Ag(3)   | 71.50(6)   |
| Ag(1)-Ag(3)-Ag(5)   | 95.80(8)   | P(8)-Ag(6)-P(6)     | 122.3(2)   |
| C(101)-Ag(3)-Ag(4)  | 107.4(6)   | P(8)-Ag(6)-C(158)   | 110.1(6)   |
| C(139)-Ag(3)-Ag(4)  | 45.4(6)    | P(6)-Ag(6)-C(158)   | 112.5(5)   |
| P(4)-Ag(3)-Ag(4)    | 106.57(17) | P(8)-Ag(6)-C(139)   | 107.4(5)   |
| Ag(1)-Ag(3)-Ag(4)   | 96.82(8)   | P(6)-Ag(6)-C(139)   | 109.3(5)   |
| Ag(5)-Ag(3)-Ag(4)   | 69.89(7)   | C(158)-Ag(6)-C(139) | 90.4(8)    |
| C(139)-Ag(4)-P(7)   | 136.6(6)   | P(8)-Ag(6)-Ag(5)    | 151.19(16) |
| C(139)-Ag(4)-C(120) | 114.9(8)   | P(6)-Ag(6)-Ag(5)    | 85.83(17)  |
| P(7)-Ag(4)-C(120)   | 107.4(5)   | C(158)-Ag(6)-Ag(5)  | 46.3(6)    |
| C(139)-Ag(4)-Ag(6)  | 57.3(7)    | C(139)-Ag(6)-Ag(5)  | 63.5(5)    |
| P(7)-Ag(4)-Ag(6)    | 95.19(17)  | P(8)-Ag(6)-Ag(4)    | 83.55(16)  |
| C(120)-Ag(4)-Ag(6)  | 140.2(5)   | P(6)-Ag(6)-Ag(4)    | 151.2(2)   |

|                     |           |                     |           |
|---------------------|-----------|---------------------|-----------|
| C(158)-Ag(6)-Ag(4)  | 63.1(5)   | C(143)-Re(3)-C(142) | 176.9(9)  |
| C(139)-Ag(6)-Ag(4)  | 45.1(5)   | C(145)-Re(3)-C(142) | 96.9(17)  |
| Ag(5)-Ag(6)-Ag(4)   | 70.99(6)  | C(144)-Re(3)-C(142) | 96.2(17)  |
| C(125)-Re(2)-C(124) | 91.3(10)  | C(143)-Re(3)-N(6)   | 93.9(6)   |
| C(125)-Re(2)-C(126) | 89.2(10)  | C(145)-Re(3)-N(6)   | 167.1(14) |
| C(124)-Re(2)-C(126) | 89.0(9)   | C(144)-Re(3)-N(6)   | 108.6(13) |
| C(125)-Re(2)-C(123) | 92.5(11)  | C(142)-Re(3)-N(6)   | 83.1(9)   |
| C(124)-Re(2)-C(123) | 175.1(12) | C(143)-Re(3)-N(5)   | 94.6(7)   |
| C(126)-Re(2)-C(123) | 94.1(10)  | C(145)-Re(3)-N(5)   | 93.8(14)  |
| C(125)-Re(2)-N(3)   | 171.9(10) | C(144)-Re(3)-N(5)   | 178.0(13) |
| C(124)-Re(2)-N(3)   | 93.4(9)   | C(142)-Re(3)-N(5)   | 83.8(10)  |
| C(126)-Re(2)-N(3)   | 97.4(10)  | N(6)-Re(3)-N(5)     | 73.4(5)   |
| C(123)-Re(2)-N(3)   | 82.5(9)   | C(162)-Re(4)-C(163) | 89.9(15)  |
| C(125)-Re(2)-N(4)   | 99.5(10)  | C(162)-Re(4)-C(164) | 89.2(16)  |
| C(124)-Re(2)-N(4)   | 90.7(8)   | C(163)-Re(4)-C(164) | 89.3(15)  |
| C(126)-Re(2)-N(4)   | 171.2(10) | C(162)-Re(4)-N(8)   | 90.4(12)  |
| C(123)-Re(2)-N(4)   | 85.6(8)   | C(163)-Re(4)-N(8)   | 95.5(18)  |
| N(3)-Re(2)-N(4)     | 73.8(5)   | C(164)-Re(4)-N(8)   | 175.1(17) |
| C(106)-Re(1)-C(105) | 84.5(12)  | C(162)-Re(4)-N(7)   | 95.9(10)  |
| C(106)-Re(1)-C(107) | 83.8(12)  | C(163)-Re(4)-N(7)   | 170(2)    |
| C(105)-Re(1)-C(107) | 83.8(13)  | C(164)-Re(4)-N(7)   | 98.9(17)  |
| C(106)-Re(1)-C(104) | 93.0(12)  | N(8)-Re(4)-N(7)     | 76.3(7)   |
| C(105)-Re(1)-C(104) | 176.8(17) | C(162)-Re(4)-C(161) | 179.8(4)  |
| C(107)-Re(1)-C(104) | 93.8(13)  | C(163)-Re(4)-C(161) | 90.1(16)  |
| C(106)-Re(1)-N(1)   | 106.4(12) | C(164)-Re(4)-C(161) | 91.0(16)  |
| C(105)-Re(1)-N(1)   | 94.9(14)  | N(8)-Re(4)-C(161)   | 89.4(11)  |
| C(107)-Re(1)-N(1)   | 169.6(11) | N(7)-Re(4)-C(161)   | 84.0(10)  |
| C(104)-Re(1)-N(1)   | 87.8(10)  | C(25)-P(1)-C(1)     | 103.6(9)  |
| C(106)-Re(1)-N(2)   | 177.1(10) | C(25)-P(1)-C(7)     | 107.7(10) |
| C(105)-Re(1)-N(2)   | 98.4(12)  | C(1)-P(1)-C(7)      | 103.2(7)  |
| C(107)-Re(1)-N(2)   | 95.8(11)  | C(25)-P(1)-Ag(1)    | 112.3(7)  |
| C(104)-Re(1)-N(2)   | 84.1(8)   | C(1)-P(1)-Ag(1)     | 115.8(7)  |
| N(1)-Re(1)-N(2)     | 74.2(6)   | C(7)-P(1)-Ag(1)     | 113.4(6)  |
| C(143)-Re(3)-C(145) | 85.9(14)  | C(19)-P(2)-C(13)    | 100.8(9)  |
| C(143)-Re(3)-C(144) | 85.5(14)  | C(19)-P(2)-C(25)    | 104.9(9)  |
| C(145)-Re(3)-C(144) | 84.3(13)  | C(13)-P(2)-C(25)    | 107.6(9)  |

|                   |           |                   |           |
|-------------------|-----------|-------------------|-----------|
| C(19)-P(2)-Ag(2)  | 116.3(7)  | C(94)-P(8)-Ag(6)  | 112.9(7)  |
| C(13)-P(2)-Ag(2)  | 116.6(6)  | C(88)-P(8)-Ag(6)  | 117.1(6)  |
| C(25)-P(2)-Ag(2)  | 109.6(8)  | C(100)-P(8)-Ag(6) | 113.9(8)  |
| C(50)-P(3)-C(26)  | 105.1(12) | C(2)-C(1)-C(6)    | 120.0     |
| C(50)-P(3)-C(32)  | 102.4(10) | C(2)-C(1)-P(1)    | 119.7(9)  |
| C(26)-P(3)-C(32)  | 105.2(10) | C(6)-C(1)-P(1)    | 120.2(9)  |
| C(50)-P(3)-Ag(1)  | 113.3(10) | C(3)-C(2)-C(1)    | 120.0     |
| C(26)-P(3)-Ag(1)  | 116.6(8)  | C(2)-C(3)-C(4)    | 120.0     |
| C(32)-P(3)-Ag(1)  | 112.8(9)  | C(5)-C(4)-C(3)    | 120.0     |
| C(44)-P(4)-C(50)  | 105.2(9)  | C(6)-C(5)-C(4)    | 120.0     |
| C(44)-P(4)-C(38)  | 100.5(10) | C(5)-C(6)-C(1)    | 120.0     |
| C(50)-P(4)-C(38)  | 103.0(11) | C(8)-C(7)-C(12)   | 120.0     |
| C(44)-P(4)-Ag(3)  | 117.6(8)  | C(8)-C(7)-P(1)    | 116.8(9)  |
| C(50)-P(4)-Ag(3)  | 110.9(9)  | C(12)-C(7)-P(1)   | 123.0(10) |
| C(38)-P(4)-Ag(3)  | 117.9(7)  | C(9)-C(8)-C(7)    | 120.0     |
| C(57)-P(5)-C(51)  | 101.1(9)  | C(8)-C(9)-C(10)   | 120.0     |
| C(57)-P(5)-C(75)  | 104.1(11) | C(9)-C(10)-C(11)  | 120.0     |
| C(51)-P(5)-C(75)  | 105.9(9)  | C(12)-C(11)-C(10) | 120.0     |
| C(57)-P(5)-Ag(5)  | 113.6(6)  | C(11)-C(12)-C(7)  | 120.0     |
| C(51)-P(5)-Ag(5)  | 116.8(7)  | C(14)-C(13)-C(18) | 120.0     |
| C(75)-P(5)-Ag(5)  | 113.7(7)  | C(14)-C(13)-P(2)  | 116.8(12) |
| C(63)-P(6)-C(75)  | 107.5(11) | C(18)-C(13)-P(2)  | 123.2(12) |
| C(63)-P(6)-C(69)  | 109.7(11) | C(15)-C(14)-C(13) | 120.0     |
| C(75)-P(6)-C(69)  | 103.8(12) | C(16)-C(15)-C(14) | 120.0     |
| C(63)-P(6)-Ag(6)  | 111.1(9)  | C(15)-C(16)-C(17) | 120.0     |
| C(75)-P(6)-Ag(6)  | 114.0(7)  | C(18)-C(17)-C(16) | 120.0     |
| C(69)-P(6)-Ag(6)  | 110.5(9)  | C(17)-C(18)-C(13) | 120.0     |
| C(100)-P(7)-C(76) | 100.1(12) | C(20)-C(19)-C(24) | 120.0     |
| C(100)-P(7)-C(82) | 102.6(10) | C(20)-C(19)-P(2)  | 118.4(12) |
| C(76)-P(7)-C(82)  | 103.5(8)  | C(24)-C(19)-P(2)  | 121.5(12) |
| C(100)-P(7)-Ag(4) | 113.7(8)  | C(19)-C(20)-C(21) | 120.0     |
| C(76)-P(7)-Ag(4)  | 119.9(7)  | C(22)-C(21)-C(20) | 120.0     |
| C(82)-P(7)-Ag(4)  | 114.7(8)  | C(23)-C(22)-C(21) | 120.0     |
| C(94)-P(8)-C(88)  | 105.1(9)  | C(22)-C(23)-C(24) | 120.0     |
| C(94)-P(8)-C(100) | 105.6(10) | C(23)-C(24)-C(19) | 120.0     |
| C(88)-P(8)-C(100) | 100.8(11) | P(1)-C(25)-P(2)   | 113.3(10) |

|                   |           |                   |           |
|-------------------|-----------|-------------------|-----------|
| C(27)-C(26)-C(31) | 120.0     | C(53)-C(52)-C(51) | 120.0     |
| C(27)-C(26)-P(3)  | 119.8(14) | C(54)-C(53)-C(52) | 120.0     |
| C(31)-C(26)-P(3)  | 120.0(15) | C(53)-C(54)-C(55) | 120.0     |
| C(28)-C(27)-C(26) | 120.0     | C(56)-C(55)-C(54) | 120.0     |
| C(27)-C(28)-C(29) | 120.0     | C(55)-C(56)-C(51) | 120.0     |
| C(28)-C(29)-C(30) | 120.0     | C(58)-C(57)-C(62) | 120.0     |
| C(31)-C(30)-C(29) | 120.0     | C(58)-C(57)-P(5)  | 123.1(15) |
| C(30)-C(31)-C(26) | 120.0     | C(62)-C(57)-P(5)  | 116.9(15) |
| C(33)-C(32)-C(37) | 120.0     | C(57)-C(58)-C(59) | 120.0     |
| C(33)-C(32)-P(3)  | 118.0(12) | C(58)-C(59)-C(60) | 120.0     |
| C(37)-C(32)-P(3)  | 121.8(12) | C(61)-C(60)-C(59) | 120.0     |
| C(32)-C(33)-C(34) | 120.0     | C(62)-C(61)-C(60) | 120.0     |
| C(35)-C(34)-C(33) | 120.0     | C(61)-C(62)-C(57) | 120.0     |
| C(36)-C(35)-C(34) | 120.0     | C(64)-C(63)-C(68) | 120.0     |
| C(35)-C(36)-C(37) | 120.0     | C(64)-C(63)-P(6)  | 120.3(17) |
| C(36)-C(37)-C(32) | 120.0     | C(68)-C(63)-P(6)  | 119.6(17) |
| C(39)-C(38)-C(43) | 120.0     | C(65)-C(64)-C(63) | 120.0     |
| C(39)-C(38)-P(4)  | 120.5(13) | C(64)-C(65)-C(66) | 120.0     |
| C(43)-C(38)-P(4)  | 119.5(13) | C(67)-C(66)-C(65) | 120.0     |
| C(40)-C(39)-C(38) | 120.0     | C(68)-C(67)-C(66) | 120.0     |
| C(39)-C(40)-C(41) | 120.0     | C(67)-C(68)-C(63) | 120.0     |
| C(42)-C(41)-C(40) | 120.0     | C(70)-C(69)-C(74) | 120.0     |
| C(43)-C(42)-C(41) | 120.0     | C(70)-C(69)-P(6)  | 126.0(18) |
| C(42)-C(43)-C(38) | 120.0     | C(74)-C(69)-P(6)  | 113.9(18) |
| C(45)-C(44)-C(49) | 120.0     | C(69)-C(70)-C(71) | 120.0     |
| C(45)-C(44)-P(4)  | 121.4(11) | C(72)-C(71)-C(70) | 120.0     |
| C(49)-C(44)-P(4)  | 118.6(11) | C(71)-C(72)-C(73) | 120.0     |
| C(46)-C(45)-C(44) | 120.0     | C(74)-C(73)-C(72) | 120.0     |
| C(47)-C(46)-C(45) | 120.0     | C(73)-C(74)-C(69) | 120.0     |
| C(46)-C(47)-C(48) | 120.0     | P(6)-C(75)-P(5)   | 109.9(12) |
| C(49)-C(48)-C(47) | 120.0     | C(77)-C(76)-C(81) | 120.0     |
| C(48)-C(49)-C(44) | 120.0     | C(77)-C(76)-P(7)  | 122.1(13) |
| P(3)-C(50)-P(4)   | 111.5(12) | C(81)-C(76)-P(7)  | 117.7(13) |
| C(52)-C(51)-C(56) | 120.0     | C(76)-C(77)-C(78) | 120.0     |
| C(52)-C(51)-P(5)  | 121.9(12) | C(79)-C(78)-C(77) | 120.0     |
| C(56)-C(51)-P(5)  | 117.8(12) | C(78)-C(79)-C(80) | 120.0     |

|                      |           |                      |           |
|----------------------|-----------|----------------------|-----------|
| C(79)-C(80)-C(81)    | 120.0     | O(1)-C(105)-Re(1)    | 169(4)    |
| C(80)-C(81)-C(76)    | 120.0     | O(2)-C(106)-Re(1)    | 165(3)    |
| C(83)-C(82)-C(87)    | 120.0     | O(3)-C(107)-Re(1)    | 163(4)    |
| C(83)-C(82)-P(7)     | 122.3(13) | C(108)-N(1)-C(112)   | 120.0     |
| C(87)-C(82)-P(7)     | 117.7(13) | C(108)-N(1)-Re(1)    | 123.2(11) |
| C(84)-C(83)-C(82)    | 120.0     | C(112)-N(1)-Re(1)    | 116.8(11) |
| C(83)-C(84)-C(85)    | 120.0     | C(109)-C(108)-N(1)   | 120.0     |
| C(86)-C(85)-C(84)    | 120.0     | C(108)-C(109)-C(110) | 120.0     |
| C(87)-C(86)-C(85)    | 120.0     | C(111)-C(110)-C(109) | 120.0     |
| C(86)-C(87)-C(82)    | 120.0     | C(111)-C(110)-C(118) | 125(2)    |
| C(89)-C(88)-C(93)    | 120.0     | C(109)-C(110)-C(118) | 115(2)    |
| C(89)-C(88)-P(8)     | 117.7(13) | C(112)-C(111)-C(110) | 120.0     |
| C(93)-C(88)-P(8)     | 122.2(13) | C(113)-C(112)-C(111) | 119.7(19) |
| C(88)-C(89)-C(90)    | 120.0     | C(113)-C(112)-N(1)   | 120.1(19) |
| C(91)-C(90)-C(89)    | 120.0     | C(111)-C(112)-N(1)   | 120.0     |
| C(92)-C(91)-C(90)    | 120.0     | C(113)-N(2)-C(117)   | 120.0     |
| C(91)-C(92)-C(93)    | 120.0     | C(113)-N(2)-Re(1)    | 116.4(11) |
| C(92)-C(93)-C(88)    | 120.0     | C(117)-N(2)-Re(1)    | 123.5(11) |
| C(95)-C(94)-C(99)    | 120.0     | C(112)-C(113)-C(114) | 127.8(18) |
| C(95)-C(94)-P(8)     | 124.2(12) | C(112)-C(113)-N(2)   | 112.2(18) |
| C(99)-C(94)-P(8)     | 115.6(12) | C(114)-C(113)-N(2)   | 120.0     |
| C(96)-C(95)-C(94)    | 120.0     | C(113)-C(114)-C(115) | 120.0     |
| C(95)-C(96)-C(97)    | 120.0     | C(116)-C(115)-C(114) | 120.0     |
| C(98)-C(97)-C(96)    | 120.0     | C(116)-C(115)-C(119) | 125(2)    |
| C(99)-C(98)-C(97)    | 120.0     | C(114)-C(115)-C(119) | 115(2)    |
| C(98)-C(99)-C(94)    | 120.0     | C(117)-C(116)-C(115) | 120.0     |
| P(7)-C(100)-P(8)     | 110.3(15) | C(116)-C(117)-N(2)   | 120.0     |
| C(102)-C(101)-Ag(3)  | 160(2)    | C(121)-C(120)-Ag(2)  | 160(2)    |
| C(102)-C(101)-Ag(5)  | 116.1(18) | C(121)-C(120)-Ag(1)  | 110.6(16) |
| Ag(3)-C(101)-Ag(5)   | 79.6(7)   | Ag(2)-C(120)-Ag(1)   | 79.6(6)   |
| C(102)-C(101)-Ag(1)  | 100.4(15) | C(121)-C(120)-Ag(4)  | 103.0(14) |
| Ag(3)-C(101)-Ag(1)   | 76.8(6)   | Ag(2)-C(120)-Ag(4)   | 80.4(7)   |
| Ag(5)-C(101)-Ag(1)   | 127.5(9)  | Ag(1)-C(120)-Ag(4)   | 130.8(9)  |
| C(101)-C(102)-C(103) | 174(2)    | C(120)-C(121)-C(122) | 172(2)    |
| C(104)-C(103)-C(102) | 178(3)    | C(123)-C(122)-C(121) | 176(3)    |
| C(103)-C(104)-Re(1)  | 171(3)    | C(122)-C(123)-Re(2)  | 180(3)    |

|                      |           |                      |           |
|----------------------|-----------|----------------------|-----------|
| O(4)-C(124)-Re(2)    | 177(3)    | O(7)-C(143)-Re(3)    | 179.4(9)  |
| O(5)-C(125)-Re(2)    | 177(3)    | O(8)-C(144)-Re(3)    | 149(4)    |
| O(6)-C(126)-Re(2)    | 175(2)    | O(9)-C(145)-Re(3)    | 144(3)    |
| C(127)-N(3)-C(131)   | 120.0     | C(146)-N(5)-C(150)   | 120.0     |
| C(127)-N(3)-Re(2)    | 124.3(9)  | C(146)-N(5)-Re(3)    | 121.7(10) |
| C(131)-N(3)-Re(2)    | 115.6(9)  | C(150)-N(5)-Re(3)    | 117.6(10) |
| N(3)-C(127)-C(128)   | 120.0     | C(147)-C(146)-N(5)   | 120.0     |
| C(129)-C(128)-C(127) | 120.0     | C(148)-C(147)-C(146) | 120.0     |
| C(128)-C(129)-C(130) | 120.0     | C(147)-C(148)-C(149) | 120.0     |
| C(128)-C(129)-C(137) | 116(2)    | C(147)-C(148)-C(156) | 125(2)    |
| C(130)-C(129)-C(137) | 124(2)    | C(149)-C(148)-C(156) | 115(2)    |
| C(131)-C(130)-C(129) | 120.0     | C(150)-C(149)-C(148) | 120.0     |
| C(132)-C(131)-C(130) | 122.2(15) | C(151)-C(150)-C(149) | 126.2(15) |
| C(132)-C(131)-N(3)   | 117.3(15) | C(151)-C(150)-N(5)   | 113.7(15) |
| C(130)-C(131)-N(3)   | 120.0     | C(149)-C(150)-N(5)   | 120.0     |
| C(132)-N(4)-C(136)   | 120.0     | C(151)-N(6)-C(155)   | 120.0     |
| C(132)-N(4)-Re(2)    | 116.8(8)  | C(151)-N(6)-Re(3)    | 117.1(10) |
| C(136)-N(4)-Re(2)    | 122.9(8)  | C(155)-N(6)-Re(3)    | 122.7(10) |
| C(131)-C(132)-C(133) | 124.2(14) | C(150)-C(151)-C(152) | 122.5(15) |
| C(131)-C(132)-N(4)   | 115.4(14) | C(150)-C(151)-N(6)   | 117.3(15) |
| C(133)-C(132)-N(4)   | 120.0     | C(152)-C(151)-N(6)   | 120.0     |
| C(132)-C(133)-C(134) | 120.0     | C(151)-C(152)-C(153) | 120.0     |
| C(135)-C(134)-C(133) | 120.0     | C(154)-C(153)-C(152) | 120.0     |
| C(135)-C(134)-C(138) | 117.6(18) | C(154)-C(153)-C(157) | 119(2)    |
| C(133)-C(134)-C(138) | 122.3(18) | C(152)-C(153)-C(157) | 121(2)    |
| C(136)-C(135)-C(134) | 120.0     | C(153)-C(154)-C(155) | 120.0     |
| C(135)-C(136)-N(4)   | 120.0     | C(154)-C(155)-N(6)   | 120.0     |
| C(140)-C(139)-Ag(4)  | 163.2(19) | C(159)-C(158)-Ag(5)  | 157(2)    |
| C(140)-C(139)-Ag(3)  | 110(2)    | C(159)-C(158)-Ag(2)  | 115.9(19) |
| Ag(4)-C(139)-Ag(3)   | 82.8(7)   | Ag(5)-C(158)-Ag(2)   | 80.1(9)   |
| C(140)-C(139)-Ag(6)  | 100.0(18) | C(159)-C(158)-Ag(6)  | 101.1(18) |
| Ag(4)-C(139)-Ag(6)   | 77.6(8)   | Ag(5)-C(158)-Ag(6)   | 77.2(8)   |
| Ag(3)-C(139)-Ag(6)   | 130.1(10) | Ag(2)-C(158)-Ag(6)   | 129.9(12) |
| C(139)-C(140)-C(141) | 178(3)    | C(158)-C(159)-C(160) | 177(3)    |
| C(142)-C(141)-C(140) | 175(3)    | C(161)-C(160)-C(159) | 175(3)    |
| C(141)-C(142)-Re(3)  | 169(3)    | C(160)-C(161)-Re(4)  | 178(3)    |

|                      |           |                   |           |
|----------------------|-----------|-------------------|-----------|
| O(10)-C(162)-Re(4)   | 171(3)    | F(6)-P(9)-F(1)    | 89.6(8)   |
| O(11)-C(163)-Re(4)   | 164(5)    | F(5)-P(9)-F(4)    | 90.0(8)   |
| O(12)-C(164)-Re(4)   | 157(4)    | F(2)-P(9)-F(4)    | 179.0(10) |
| C(165)-N(7)-C(169)   | 120.0     | F(3)-P(9)-F(4)    | 90.7(8)   |
| C(165)-N(7)-Re(4)    | 125.9(13) | F(6)-P(9)-F(4)    | 89.0(8)   |
| C(169)-N(7)-Re(4)    | 114.0(13) | F(1)-P(9)-F(4)    | 89.4(8)   |
| C(166)-C(165)-N(7)   | 120.0     | F(8)-P(10)-F(11)  | 91.7(8)   |
| C(165)-C(166)-C(167) | 120.0     | F(8)-P(10)-F(7)   | 91.0(8)   |
| C(166)-C(167)-C(168) | 120.0     | F(11)-P(10)-F(7)  | 90.4(8)   |
| C(166)-C(167)-C(175) | 115(3)    | F(8)-P(10)-F(9)   | 91.3(8)   |
| C(168)-C(167)-C(175) | 124(3)    | F(11)-P(10)-F(9)  | 90.4(8)   |
| C(169)-C(168)-C(167) | 120.0     | F(7)-P(10)-F(9)   | 177.6(10) |
| C(170)-C(169)-C(168) | 125(2)    | F(8)-P(10)-F(12)  | 91.3(8)   |
| C(170)-C(169)-N(7)   | 114(2)    | F(11)-P(10)-F(12) | 176.9(10) |
| C(168)-C(169)-N(7)   | 120.0     | F(7)-P(10)-F(12)  | 90.2(8)   |
| C(170)-N(8)-C(174)   | 120.0     | F(9)-P(10)-F(12)  | 89.0(8)   |
| C(170)-N(8)-Re(4)    | 117.5(16) | F(8)-P(10)-F(10)  | 179.3(11) |
| C(174)-N(8)-Re(4)    | 122.5(16) | F(11)-P(10)-F(10) | 88.9(8)   |
| C(169)-C(170)-C(171) | 122(2)    | F(7)-P(10)-F(10)  | 88.5(8)   |
| C(169)-C(170)-N(8)   | 115(2)    | F(9)-P(10)-F(10)  | 89.2(8)   |
| C(171)-C(170)-N(8)   | 120.0     | F(12)-P(10)-F(10) | 88.1(8)   |
| C(172)-C(171)-C(170) | 120.0     |                   |           |
| C(171)-C(172)-C(173) | 120.0     |                   |           |
| C(171)-C(172)-C(176) | 130(4)    |                   |           |
| C(173)-C(172)-C(176) | 110(4)    |                   |           |
| C(172)-C(173)-C(174) | 120.0     |                   |           |
| C(173)-C(174)-N(8)   | 120.0     |                   |           |
| F(5)-P(9)-F(2)       | 90.8(8)   |                   |           |
| F(5)-P(9)-F(3)       | 90.7(8)   |                   |           |
| F(2)-P(9)-F(3)       | 89.9(8)   |                   |           |
| F(5)-P(9)-F(6)       | 179.0(11) |                   |           |
| F(2)-P(9)-F(6)       | 90.2(8)   |                   |           |
| F(3)-P(9)-F(6)       | 89.2(8)   |                   |           |
| F(5)-P(9)-F(1)       | 90.5(8)   |                   |           |
| F(2)-P(9)-F(1)       | 89.9(8)   |                   |           |
| F(3)-P(9)-F(1)       | 178.8(11) |                   |           |



---

Symmetry transformations used to generate equivalent atoms:

Table 4. Anisotropic displacement parameters ( $\text{\AA}^2 \times 10^3$ ) for mar499. The anisotropic displacement factor exponent takes the form:  $-2\pi^2 [ h^2 a^{*2} U^{11} + \dots + 2 h k a^* b^* U^{12} ]$

|       | $U^{11}$ | $U^{22}$ | $U^{33}$ | $U^{23}$ | $U^{13}$ | $U^{12}$ |
|-------|----------|----------|----------|----------|----------|----------|
| Ag(1) | 88(1)    | 82(1)    | 73(2)    | -5(1)    | -11(1)   | 0(1)     |
| Ag(2) | 71(1)    | 82(1)    | 75(2)    | -6(1)    | -7(1)    | -1(1)    |
| Ag(3) | 88(1)    | 81(1)    | 78(2)    | 5(1)     | -9(1)    | -4(1)    |
| Ag(4) | 86(1)    | 79(1)    | 84(2)    | 6(1)     | 5(1)     | -5(1)    |
| Ag(5) | 62(1)    | 93(1)    | 83(2)    | 9(1)     | 3(1)     | 2(1)     |
| Ag(6) | 86(1)    | 85(1)    | 100(2)   | 17(1)    | 11(1)    | 0(1)     |
| Re(2) | 76(1)    | 140(1)   | 100(1)   | -19(1)   | -20(1)   | -17(1)   |
| Re(1) | 129(1)   | 171(1)   | 143(2)   | -50(1)   | 31(1)    | -77(1)   |
| Re(3) | 130(1)   | 215(2)   | 133(2)   | -73(1)   | 67(1)    | -50(1)   |
| Re(4) | 282(2)   | 208(2)   | 68(1)    | -4(1)    | 12(1)    | -116(2)  |
| P(1)  | 79(4)    | 78(4)    | 76(6)    | -6(4)    | -6(3)    | -2(3)    |
| P(2)  | 74(3)    | 84(4)    | 77(6)    | -6(4)    | -14(3)   | -2(3)    |
| P(3)  | 102(4)   | 84(4)    | 75(6)    | 1(4)     | -9(4)    | 3(3)     |
| P(4)  | 95(4)    | 98(5)    | 65(5)    | -5(4)    | -4(4)    | 4(3)     |
| P(5)  | 65(3)    | 92(5)    | 111(7)   | 7(4)     | 1(4)     | 9(3)     |
| P(6)  | 93(4)    | 103(5)   | 109(8)   | 21(5)    | 6(4)     | 21(4)    |
| P(7)  | 89(4)    | 91(4)    | 80(6)    | 12(4)    | 5(4)     | -9(3)    |
| P(8)  | 105(4)   | 76(4)    | 90(6)    | 12(4)    | 9(4)     | 2(3)     |
| P(9)  | 248(14)  | 370(20)  | 190(20)  | -121(17) | 42(13)   | -85(15)  |
| P(10) | 240(13)  | 292(17)  | 185(18)  | 43(13)   | 101(13)  | 72(13)   |

Table 5. Hydrogen coordinates ( $\times 10^4$ ) and isotropic displacement parameters ( $\text{\AA}^2 \times 10^3$ ) for mar499.

|        | x     | y    | z    | U(eq) |
|--------|-------|------|------|-------|
| H(2)   | 1626  | 5375 | 1886 | 177   |
| H(3)   | 1615  | 6075 | 1610 | 183   |
| H(4)   | 609   | 6425 | 1485 | 172   |
| H(5)   | -385  | 6074 | 1635 | 131   |
| H(6)   | -374  | 5374 | 1911 | 118   |
| H(8)   | -504  | 4220 | 1972 | 122   |
| H(9)   | -1521 | 4084 | 2258 | 117   |
| H(10)  | -1811 | 4468 | 2796 | 152   |
| H(11)  | -1084 | 4989 | 3049 | 144   |
| H(12)  | -67   | 5125 | 2763 | 108   |
| H(14)  | 1991  | 3613 | 3198 | 162   |
| H(15)  | 2996  | 3590 | 3517 | 180   |
| H(16)  | 3718  | 4194 | 3491 | 179   |
| H(17)  | 3434  | 4821 | 3145 | 217   |
| H(18)  | 2429  | 4844 | 2827 | 188   |
| H(20)  | 193   | 3739 | 3001 | 147   |
| H(21)  | -538  | 3796 | 3500 | 215   |
| H(22)  | -419  | 4370 | 3930 | 213   |
| H(23)  | 431   | 4888 | 3859 | 192   |
| H(24)  | 1162  | 4831 | 3360 | 130   |
| H(25A) | 1108  | 5003 | 2637 | 88    |
| H(25B) | 1655  | 4838 | 2357 | 88    |
| H(27)  | 1927  | 4471 | 1074 | 155   |
| H(28)  | 2773  | 4646 | 659  | 229   |
| H(29)  | 2550  | 4688 | 24   | 188   |
| H(30)  | 1481  | 4554 | -194 | 205   |
| H(31)  | 635   | 4379 | 221  | 171   |
| H(33)  | 421   | 5147 | 842  | 172   |
| H(34)  | -434  | 5666 | 802  | 165   |
| H(35)  | -1531 | 5441 | 880  | 174   |

|        |       |      |      |     |
|--------|-------|------|------|-----|
| H(36)  | -1772 | 4697 | 998  | 226 |
| H(37)  | -918  | 4178 | 1038 | 206 |
| H(39)  | 502   | 3227 | 50   | 167 |
| H(40)  | 1073  | 3266 | -513 | 219 |
| H(41)  | 2221  | 3348 | -516 | 164 |
| H(42)  | 2800  | 3391 | 44   | 175 |
| H(43)  | 2230  | 3351 | 606  | 157 |
| H(45)  | -509  | 3006 | 636  | 158 |
| H(46)  | -1077 | 2346 | 521  | 200 |
| H(47)  | -533  | 1667 | 580  | 167 |
| H(48)  | 579   | 1648 | 754  | 175 |
| H(49)  | 1147  | 2308 | 869  | 146 |
| H(50A) | 124   | 3755 | 549  | 113 |
| H(50B) | -167  | 3615 | 938  | 113 |
| H(52)  | 4976  | 3069 | 1834 | 151 |
| H(53)  | 5806  | 3363 | 2211 | 161 |
| H(54)  | 5526  | 3788 | 2729 | 217 |
| H(55)  | 4416  | 3919 | 2870 | 221 |
| H(56)  | 3585  | 3625 | 2493 | 153 |
| H(58)  | 3864  | 2677 | 1137 | 317 |
| H(59)  | 4048  | 2979 | 550  | 502 |
| H(60)  | 3980  | 3745 | 462  | 267 |
| H(61)  | 3729  | 4209 | 961  | 183 |
| H(62)  | 3546  | 3906 | 1548 | 152 |
| H(64)  | 4663  | 2287 | 2477 | 197 |
| H(65)  | 5149  | 2543 | 3024 | 353 |
| H(66)  | 4488  | 2720 | 3534 | 238 |
| H(67)  | 3340  | 2642 | 3497 | 219 |
| H(68)  | 2854  | 2385 | 2950 | 230 |
| H(70)  | 4463  | 1582 | 1927 | 212 |
| H(71)  | 4623  | 820  | 1860 | 306 |
| H(72)  | 3778  | 327  | 2019 | 317 |
| H(73)  | 2773  | 597  | 2245 | 377 |
| H(74)  | 2613  | 1359 | 2311 | 355 |
| H(75A) | 3603  | 2330 | 1602 | 100 |
| H(75B) | 4221  | 2413 | 1861 | 100 |

|        |       |      |      |     |
|--------|-------|------|------|-----|
| H(77)  | -307  | 2122 | 3153 | 211 |
| H(78)  | -1019 | 2485 | 3563 | 196 |
| H(79)  | -1540 | 3142 | 3384 | 156 |
| H(80)  | -1349 | 3437 | 2795 | 149 |
| H(81)  | -637  | 3074 | 2385 | 133 |
| H(83)  | -858  | 1560 | 2557 | 171 |
| H(84)  | -1603 | 1129 | 2217 | 157 |
| H(85)  | -1695 | 1227 | 1577 | 187 |
| H(86)  | -1042 | 1755 | 1277 | 171 |
| H(87)  | -296  | 2185 | 1616 | 130 |
| H(89)  | 1843  | 1729 | 3167 | 151 |
| H(90)  | 2211  | 1243 | 3627 | 196 |
| H(91)  | 2214  | 480  | 3519 | 190 |
| H(92)  | 1847  | 202  | 2950 | 140 |
| H(93)  | 1479  | 688  | 2490 | 125 |
| H(95)  | 223   | 1037 | 2271 | 145 |
| H(96)  | -112  | 666  | 1734 | 160 |
| H(97)  | 509   | 729  | 1191 | 180 |
| H(98)  | 1465  | 1163 | 1184 | 201 |
| H(99)  | 1800  | 1534 | 1720 | 164 |
| H(10A) | 239   | 1621 | 2724 | 120 |
| H(10B) | 648   | 2009 | 2909 | 120 |
| H(108) | 2732  | 5974 | 1489 | 179 |
| H(109) | 2587  | 6092 | 854  | 211 |
| H(111) | 4116  | 5268 | 636  | 189 |
| H(114) | 4750  | 4771 | 830  | 142 |
| H(116) | 5515  | 4225 | 1760 | 147 |
| H(117) | 4851  | 4689 | 2122 | 170 |
| H(11A) | 2848  | 6031 | 247  | 372 |
| H(11B) | 3121  | 5565 | 117  | 372 |
| H(11C) | 3609  | 5969 | 165  | 372 |
| H(11D) | 5448  | 4198 | 732  | 296 |
| H(11E) | 5364  | 3819 | 1030 | 296 |
| H(11F) | 6010  | 4112 | 1027 | 296 |
| H(127) | -2175 | 2247 | 1815 | 147 |
| H(128) | -2357 | 1994 | 2418 | 170 |

|        |       |      |      |     |
|--------|-------|------|------|-----|
| H(130) | -2983 | 3216 | 2718 | 134 |
| H(133) | -3062 | 3869 | 2575 | 120 |
| H(135) | -3006 | 4758 | 1735 | 147 |
| H(136) | -2632 | 4204 | 1333 | 123 |
| H(13A) | -3007 | 2595 | 3181 | 337 |
| H(13B) | -2443 | 2242 | 3116 | 337 |
| H(13C) | -3173 | 2140 | 2986 | 337 |
| H(13D) | -3334 | 5027 | 2310 | 237 |
| H(13E) | -2971 | 4799 | 2647 | 237 |
| H(13F) | -3718 | 4686 | 2563 | 237 |
| H(146) | 2744  | 2256 | -6   | 181 |
| H(147) | 1705  | 2367 | -273 | 185 |
| H(149) | 1085  | 1192 | 142  | 168 |
| H(152) | 1412  | 597  | 423  | 150 |
| H(154) | 2708  | 119  | 1179 | 208 |
| H(155) | 3391  | 732  | 1082 | 188 |
| H(15A) | 348   | 1543 | -220 | 298 |
| H(15B) | 675   | 1787 | -560 | 298 |
| H(15C) | 371   | 2066 | -232 | 298 |
| H(15D) | 1147  | -90  | 727  | 344 |
| H(15E) | 1407  | -119 | 1139 | 344 |
| H(15F) | 1774  | -381 | 821  | 344 |
| H(165) | 789   | 3601 | 4160 | 221 |
| H(166) | 1357  | 4272 | 4214 | 230 |
| H(168) | 3083  | 3605 | 4316 | 187 |
| H(171) | 3489  | 2971 | 4449 | 318 |
| H(173) | 3285  | 1666 | 4215 | 252 |
| H(174) | 2155  | 1771 | 4115 | 375 |
| H(17A) | 3065  | 4445 | 4383 | 433 |
| H(17B) | 2404  | 4596 | 4578 | 433 |
| H(17C) | 2501  | 4674 | 4149 | 433 |
| H(17D) | 4506  | 2389 | 4483 | 671 |
| H(17E) | 4406  | 2020 | 4179 | 671 |
| H(17F) | 4238  | 1917 | 4597 | 671 |

---

**Crystal data:** [C<sub>176</sub> H<sub>112</sub> Ag<sub>6</sub> Br<sub>8</sub> F<sub>12</sub> N<sub>8</sub> O<sub>12</sub> P<sub>10</sub> Re<sub>4</sub>] (4); formula weight = 5099.74, Tetragonal, P 4<sub>2</sub>/n, a = 27.379(4) Å, c = 16.984(3) Å, V = 12731(4) Å<sup>3</sup>, Z = 2, D<sub>c</sub> = 1.330 g cm<sup>-3</sup>, μ(Mo-Kα) = 3.712 mm<sup>-1</sup>, F(000) = 4880, T = 253 K.

**Data collection:** A crystal of dimensions 0.4 x 0.2 x 0.1 mm mounted in a glass capillary was used for data collection at -20°C on a MAR diffractometer with a 300 mm image plate detector using graphite monochromatized Mo-K<sub>α</sub> radiation (λ = 0.71073 Å). Data collection was made with 1° oscillation step of φ, 10 minutes exposure time and scanner distance at 120 mm. 180 images were collected.

**Data reduction:** The images were interpreted and intensities integrated using program DENZO<sup>i</sup>.

**Structure solution:** The structure was solved by direct methods employing SHELXS-97 program<sup>ii</sup> on PC. Re, Ag, Br and many non-H atoms were located according to the direct methods. The positions of the other non-hydrogen atoms were found after successful refinement by full-matrix least-squares using program SHELXL-97<sup>iii</sup> on PC. Due to high thermal displacements, two Br atoms were restrained to have similar Br-C bond lengths and 1,3-Br...C distances, respectively; meanwhile, four C atoms of C(11), C(14) C(18) and C(19) were refined isotropically.

**Structure refinement:** According to the SHELXL-97 program<sup>3</sup>, all 9110 independent reflections (R<sub>int</sub><sup>iv</sup> equal to 0.0518, 5662 reflections larger than 4σ(F<sub>o</sub>)) from a total 53215 reflections were participated in the full-matrix least-square refinement against F<sup>2</sup>. These reflections were in the range -31 ≤ h ≤ 31, -30 ≤ k ≤ 31, -19 ≤ l ≤ 19 with 2θ<sub>max</sub> equal to 50.94°.

One crystallographic asymmetric unit consists of one fourth of formula unit, including half of PF<sub>6</sub><sup>-</sup> anion. In the final stage of least-squares refinement, four C atoms were refined isotropically, the other non-H atoms were refined anisotropically. H atoms were generated by program SHELXL-97. The positions of H atoms were calculated based on riding mode with thermal parameters equal to 1.2 times that of the associated C atoms, and participated in the calculation of final R-indices<sup>v</sup>.

Convergence ((Δ/σ)<sub>max</sub> = 0.001, av. 0.001) for 502 variable parameters by full-matrix least-squares refinement on F<sup>2</sup> reaches to R<sub>1</sub> = 0.0665 and wR<sub>2</sub> = 0.2207 with a goodness-of-fit of 1.019, the parameters a and b for weighting scheme are 0.1643 and 0.0. The final difference Fourier map shows maximum rest peaks and holes of 1.300 and -1.625 eÅ<sup>-3</sup> respectively.

**Drawing:** The ORTEP<sup>vi</sup> drawing of the molecule was made with thermal ellipsoids at the 30 % probability level. Screen drawing is provided for reference. The drawing with high quality can be provided upon request.

**Tables:** Table (1) of Crystallographic and refinement data, table (3) of full bond lengths and bond angles and this report<sup>vii</sup> are provided. The other supplementary materials, such as table of atomic coordinates with thermal parameters, table of anisotropic displacement parameters, table of hydrogen coordinates and/or other tables and/or CIF, RES-files, can be provided under request by notifying the identification code.

Table 1. Crystal data and structure refinement for mar867.

|                                   |                                                                                                                                                  |          |
|-----------------------------------|--------------------------------------------------------------------------------------------------------------------------------------------------|----------|
| Identification code               | mar867                                                                                                                                           |          |
| Empirical formula                 | C <sub>176</sub> H <sub>112</sub> Ag <sub>6</sub> Br <sub>8</sub> F <sub>12</sub> N <sub>8</sub> O <sub>12</sub> P <sub>10</sub> Re <sub>4</sub> |          |
| Formula weight                    | 5099.74                                                                                                                                          |          |
| Temperature                       | 253(2) K                                                                                                                                         |          |
| Wavelength                        | 0.71073 Å                                                                                                                                        |          |
| Crystal system                    | Tetragonal                                                                                                                                       |          |
| Space group                       | P 4 <sub>2</sub> /n                                                                                                                              |          |
| Unit cell dimensions              | a = 27.379(4) Å                                                                                                                                  | α = 90°. |
|                                   | b = 27.379(4) Å                                                                                                                                  | β = 90°. |
|                                   | c = 16.984(3) Å                                                                                                                                  | γ = 90°. |
| Volume                            | 12731(4) Å <sup>3</sup>                                                                                                                          |          |
| Z                                 | 2                                                                                                                                                |          |
| Density (calculated)              | 1.330 Mg/m <sup>3</sup>                                                                                                                          |          |
| Absorption coefficient            | 3.712 mm <sup>-1</sup>                                                                                                                           |          |
| F(000)                            | 4880                                                                                                                                             |          |
| Crystal size                      | 0.4 x 0.2 x 0.1 mm <sup>3</sup>                                                                                                                  |          |
| Theta range for data collection   | 1.41 to 25.47°.                                                                                                                                  |          |
| Index ranges                      | -31 ≤ h ≤ 31, -30 ≤ k ≤ 31, -19 ≤ l ≤ 19                                                                                                         |          |
| Reflections collected             | 53215                                                                                                                                            |          |
| Independent reflections           | 9110 [R(int) = 0.0518]                                                                                                                           |          |
| Completeness to theta = 25.47°    | 77.1 %                                                                                                                                           |          |
| Absorption correction             | None                                                                                                                                             |          |
| Refinement method                 | Full-matrix least-squares on F <sup>2</sup>                                                                                                      |          |
| Data / restraints / parameters    | 9110 / 2 / 502                                                                                                                                   |          |
| Goodness-of-fit on F <sup>2</sup> | 1.019                                                                                                                                            |          |
| Final R indices [I > 2σ(I)]       | R1 = 0.0665, wR2 = 0.2207                                                                                                                        |          |
| R indices (all data)              | R1 = 0.1023, wR2 = 0.2395                                                                                                                        |          |
| Largest diff. peak and hole       | 1.300 and -1.625 e.Å <sup>-3</sup>                                                                                                               |          |



Table 2. Atomic coordinates ( $\times 10^4$ ) and equivalent isotropic displacement parameters ( $\text{\AA}^2 \times 10^3$ ) for mar867.  $U(\text{eq})$  is defined as one third of the trace of the orthogonalized  $U^{\text{ij}}$  tensor.

|       | x        | y        | z         | $U(\text{eq})$ |
|-------|----------|----------|-----------|----------------|
| Re(1) | 8077(1)  | 9971(1)  | 413(1)    | 107(1)         |
| Ag(1) | 8066(1)  | 7213(1)  | 1984(1)   | 59(1)          |
| Ag(2) | 7500     | 7500     | 514(1)    | 60(1)          |
| Br(1) | 10599(1) | 9301(1)  | 885(2)    | 194(1)         |
| Br(2) | 10353(1) | 8963(1)  | -929(2)   | 218(1)         |
| P(1)  | 8495(1)  | 6516(1)  | 1439(1)   | 57(1)          |
| P(2)  | 8093(1)  | 6925(1)  | -122(1)   | 57(1)          |
| O(1)  | 8270(5)  | 11015(5) | -214(9)   | 186(6)         |
| O(2)  | 7539(5)  | 10473(5) | 1802(8)   | 163(5)         |
| O(3)  | 7131(6)  | 9912(6)  | -499(9)   | 187(6)         |
| N(1)  | 8781(4)  | 9900(4)  | 1021(9)   | 107(4)         |
| N(2)  | 8579(7)  | 9623(4)  | -431(7)   | 127(5)         |
| C(1)  | 7944(3)  | 7962(4)  | 1602(4)   | 57(2)          |
| C(2)  | 7930(4)  | 8366(4)  | 1348(5)   | 59(2)          |
| C(3)  | 7946(4)  | 8837(5)  | 1041(6)   | 78(3)          |
| C(4)  | 7965(5)  | 9265(5)  | 820(7)    | 93(4)          |
| C(5)  | 8213(7)  | 10625(7) | 54(12)    | 142(6)         |
| C(6)  | 7726(6)  | 10272(6) | 1224(13)  | 138(6)         |
| C(7)  | 7493(7)  | 9941(6)  | -148(10)  | 128(5)         |
| C(8)  | 8869(6)  | 10033(6) | 1809(10)  | 125(5)         |
| C(9)  | 9311(8)  | 9936(8)  | 2105(10)  | 149(7)         |
| C(10) | 9677(7)  | 9758(6)  | 1711(12)  | 143(7)         |
| C(11) | 9620(4)  | 9614(4)  | 937(4)    | 113(4)         |
| C(12) | 9156(4)  | 9690(3)  | 630(6)    | 106(4)         |
| C(13) | 9051(3)  | 9549(4)  | -138(7)   | 107(4)         |
| C(14) | 9410(4)  | 9332(4)  | -598(5)   | 131(5)         |
| C(19) | 9874(3)  | 9256(4)  | -291(4)   | 121(5)         |
| C(18) | 9979(3)  | 9397(4)  | 477(5)    | 138(6)         |
| C(15) | 9290(9)  | 9217(7)  | -1347(15) | 163(9)         |
| C(16) | 8862(12) | 9251(8)  | -1648(12) | 173(10)        |
| C(17) | 8476(8)  | 9486(7)  | -1135(16) | 161(8)         |

|       |           |          |           |         |
|-------|-----------|----------|-----------|---------|
| C(20) | 8275(4)   | 6373(3)  | 443(4)    | 55(2)   |
| C(21) | 8466(4)   | 5919(4)  | 1934(5)   | 67(3)   |
| C(22) | 8484(5)   | 5484(4)  | 1516(7)   | 100(4)  |
| C(23) | 8479(6)   | 5044(5)  | 1951(9)   | 117(5)  |
| C(24) | 8452(5)   | 5035(5)  | 2728(9)   | 98(4)   |
| C(25) | 8424(5)   | 5451(5)  | 3099(6)   | 93(4)   |
| C(26) | 8432(4)   | 5902(4)  | 2728(5)   | 76(3)   |
| C(27) | 9151(4)   | 6609(4)  | 1324(5)   | 64(3)   |
| C(28) | 9457(5)   | 6263(4)  | 989(6)    | 84(3)   |
| C(29) | 9958(5)   | 6351(6)  | 920(8)    | 107(4)  |
| C(30) | 10150(5)  | 6775(6)  | 1202(9)   | 107(4)  |
| C(31) | 9852(6)   | 7118(5)  | 1544(11)  | 122(5)  |
| C(32) | 9357(4)   | 7045(4)  | 1602(7)   | 85(3)   |
| C(33) | 7892(4)   | 6643(4)  | -1056(5)  | 68(3)   |
| C(34) | 8160(4)   | 6258(4)  | -1398(5)  | 78(3)   |
| C(35) | 7990(6)   | 6052(5)  | -2098(6)  | 105(4)  |
| C(36) | 7562(6)   | 6235(6)  | -2432(7)  | 111(5)  |
| C(37) | 7307(5)   | 6611(5)  | -2085(7)  | 99(4)   |
| C(38) | 7480(4)   | 6815(4)  | -1412(5)  | 77(3)   |
| C(39) | 8662(4)   | 7225(4)  | -321(5)   | 58(2)   |
| C(40) | 9081(5)   | 7011(5)  | -557(6)   | 81(3)   |
| C(41) | 9506(5)   | 7238(6)  | -697(8)   | 101(4)  |
| C(42) | 9537(6)   | 7722(8)  | -608(8)   | 116(5)  |
| C(43) | 9128(7)   | 7965(6)  | -356(8)   | 115(5)  |
| C(44) | 8686(5)   | 7717(5)  | -205(6)   | 85(3)   |
| P(3)  | 9592(4)   | 9540(5)  | -3830(6)  | 162(5)  |
| F(1)  | 9705(12)  | 9122(12) | -3183(18) | 241(12) |
| F(2)  | 9560(12)  | 9925(12) | -3065(18) | 242(13) |
| F(3)  | 9130(10)  | 9398(9)  | -3633(14) | 190(9)  |
| F(4)  | 9538(9)   | 9101(9)  | -4429(12) | 167(7)  |
| F(5)  | 10060(20) | 9620(20) | -3970(30) | 390(30) |
| F(6)  | 9447(14)  | 9954(14) | -4430(20) | 270(15) |

---

Table 3. Bond lengths [Å] and angles [°] for mar867.

|               |            |             |           |
|---------------|------------|-------------|-----------|
| Re(1)-C(7)    | 1.86(2)    | C(2)-C(3)   | 1.390(16) |
| Re(1)-C(6)    | 1.87(2)    | C(3)-C(4)   | 1.232(16) |
| Re(1)-C(5)    | 1.930(18)  | C(8)-C(9)   | 1.34(2)   |
| Re(1)-C(4)    | 2.074(14)  | C(9)-C(10)  | 1.30(2)   |
| Re(1)-N(1)    | 2.196(12)  | C(10)-C(11) | 1.38(2)   |
| Re(1)-N(2)    | 2.203(15)  | C(11)-C(12) | 1.3900    |
| Ag(1)-C(1)    | 2.178(11)  | C(11)-C(18) | 1.3900    |
| Ag(1)-P(1)    | 2.423(3)   | C(12)-C(13) | 1.3900    |
| Ag(1)-C(1)#1  | 2.456(7)   | C(13)-C(14) | 1.3900    |
| Ag(1)-Ag(1)#1 | 3.0206(11) | C(14)-C(15) | 1.35(3)   |
| Ag(1)-Ag(1)#2 | 3.0206(11) | C(14)-C(19) | 1.3900    |
| Ag(1)-Ag(2)   | 3.0415(10) | C(19)-C(18) | 1.3900    |
| Ag(2)-P(2)#3  | 2.506(2)   | C(15)-C(16) | 1.28(3)   |
| Ag(2)-P(2)    | 2.506(2)   | C(16)-C(17) | 1.51(3)   |
| Ag(2)-C(1)    | 2.549(8)   | C(21)-C(26) | 1.352(13) |
| Ag(2)-C(1)#3  | 2.549(8)   | C(21)-C(22) | 1.387(15) |
| Ag(2)-Ag(1)#3 | 3.0415(10) | C(22)-C(23) | 1.414(16) |
| Br(1)-C(18)   | 1.852(8)   | C(23)-C(24) | 1.323(17) |
| Br(2)-C(19)   | 1.880(8)   | C(24)-C(25) | 1.304(17) |
| P(1)-C(27)    | 1.825(11)  | C(25)-C(26) | 1.386(16) |
| P(1)-C(20)    | 1.837(7)   | C(27)-C(28) | 1.387(14) |
| P(1)-C(21)    | 1.840(10)  | C(27)-C(32) | 1.402(14) |
| P(2)-C(39)    | 1.794(11)  | C(28)-C(29) | 1.396(17) |
| P(2)-C(33)    | 1.848(9)   | C(29)-C(30) | 1.360(18) |
| P(2)-C(20)    | 1.858(9)   | C(30)-C(31) | 1.37(2)   |
| O(1)-C(5)     | 1.171(17)  | C(31)-C(32) | 1.372(17) |
| O(2)-C(6)     | 1.24(2)    | C(33)-C(38) | 1.365(14) |
| O(3)-C(7)     | 1.160(19)  | C(33)-C(34) | 1.412(14) |
| N(1)-C(12)    | 1.350(13)  | C(34)-C(35) | 1.396(14) |
| N(1)-C(8)     | 1.407(18)  | C(35)-C(36) | 1.395(19) |
| N(2)-C(17)    | 1.28(2)    | C(36)-C(37) | 1.377(18) |
| N(2)-C(13)    | 1.398(18)  | C(37)-C(38) | 1.358(15) |
| C(1)-C(2)     | 1.188(13)  | C(39)-C(40) | 1.350(15) |
| C(1)-Ag(1)#2  | 2.456(7)   | C(39)-C(44) | 1.363(15) |

|                       |           |                      |            |
|-----------------------|-----------|----------------------|------------|
| C(40)-C(41)           | 1.341(17) | C(1)-Ag(1)-Ag(2)     | 55.5(2)    |
| C(41)-C(42)           | 1.34(2)   | P(1)-Ag(1)-Ag(2)     | 97.91(6)   |
| C(42)-C(43)           | 1.37(2)   | C(1)#1-Ag(1)-Ag(2)   | 142.0(3)   |
| C(43)-C(44)           | 1.410(19) | Ag(1)#1-Ag(1)-Ag(2)  | 98.47(3)   |
| P(3)-F(5)             | 1.31(6)   | Ag(1)#2-Ag(1)-Ag(2)  | 98.47(3)   |
| P(3)-F(3)             | 1.37(3)   | P(2)#3-Ag(2)-P(2)    | 128.92(10) |
| P(3)-F(6)             | 1.58(4)   | P(2)#3-Ag(2)-C(1)    | 108.1(2)   |
| P(3)-F(4)             | 1.58(2)   | P(2)-Ag(2)-C(1)      | 108.4(2)   |
| P(3)-F(1)             | 1.62(3)   | P(2)#3-Ag(2)-C(1)#3  | 108.4(2)   |
| P(3)-F(2)             | 1.68(3)   | P(2)-Ag(2)-C(1)#3    | 108.1(2)   |
|                       |           | C(1)-Ag(2)-C(1)#3    | 87.1(4)    |
| C(7)-Re(1)-C(6)       | 87.5(8)   | P(2)#3-Ag(2)-Ag(1)#3 | 82.01(5)   |
| C(7)-Re(1)-C(5)       | 92.6(7)   | P(2)-Ag(2)-Ag(1)#3   | 147.83(6)  |
| C(6)-Re(1)-C(5)       | 85.6(7)   | C(1)-Ag(2)-Ag(1)#3   | 61.3(2)    |
| C(7)-Re(1)-C(4)       | 90.2(6)   | C(1)#3-Ag(2)-Ag(1)#3 | 44.8(2)    |
| C(6)-Re(1)-C(4)       | 95.2(6)   | P(2)#3-Ag(2)-Ag(1)   | 147.83(6)  |
| C(5)-Re(1)-C(4)       | 177.1(7)  | P(2)-Ag(2)-Ag(1)     | 82.01(5)   |
| C(7)-Re(1)-N(1)       | 172.0(6)  | C(1)-Ag(2)-Ag(1)     | 44.8(2)    |
| C(6)-Re(1)-N(1)       | 98.2(7)   | C(1)#3-Ag(2)-Ag(1)   | 61.3(2)    |
| C(5)-Re(1)-N(1)       | 93.5(6)   | Ag(1)#3-Ag(2)-Ag(1)  | 69.74(3)   |
| C(4)-Re(1)-N(1)       | 83.7(4)   | C(27)-P(1)-C(20)     | 104.7(4)   |
| C(7)-Re(1)-N(2)       | 100.6(7)  | C(27)-P(1)-C(21)     | 102.4(5)   |
| C(6)-Re(1)-N(2)       | 171.9(8)  | C(20)-P(1)-C(21)     | 102.6(4)   |
| C(5)-Re(1)-N(2)       | 94.2(6)   | C(27)-P(1)-Ag(1)     | 114.1(3)   |
| C(4)-Re(1)-N(2)       | 84.7(4)   | C(20)-P(1)-Ag(1)     | 111.1(3)   |
| N(1)-Re(1)-N(2)       | 73.7(6)   | C(21)-P(1)-Ag(1)     | 120.3(3)   |
| C(1)-Ag(1)-P(1)       | 134.6(2)  | C(39)-P(2)-C(33)     | 106.7(4)   |
| C(1)-Ag(1)-C(1)#1     | 116.0(3)  | C(39)-P(2)-C(20)     | 103.7(4)   |
| P(1)-Ag(1)-C(1)#1     | 106.9(2)  | C(33)-P(2)-C(20)     | 100.6(4)   |
| C(1)-Ag(1)-Ag(1)#1    | 107.0(2)  | C(39)-P(2)-Ag(2)     | 110.9(3)   |
| P(1)-Ag(1)-Ag(1)#1    | 113.41(7) | C(33)-P(2)-Ag(2)     | 116.1(4)   |
| C(1)#1-Ag(1)-Ag(1)#1  | 45.4(3)   | C(20)-P(2)-Ag(2)     | 117.5(3)   |
| C(1)-Ag(1)-Ag(1)#2    | 53.46(19) | C(12)-N(1)-C(8)      | 116.6(12)  |
| P(1)-Ag(1)-Ag(1)#2    | 162.42(7) | C(12)-N(1)-Re(1)     | 118.2(10)  |
| C(1)#1-Ag(1)-Ag(1)#2  | 62.5(2)   | C(8)-N(1)-Re(1)      | 125.1(11)  |
| Ag(1)#1-Ag(1)-Ag(1)#2 | 70.29(2)  | C(17)-N(2)-C(13)     | 119.5(17)  |

|                    |           |                   |           |
|--------------------|-----------|-------------------|-----------|
| C(17)-N(2)-Re(1)   | 126.4(18) | C(15)-C(16)-C(17) | 116(2)    |
| C(13)-N(2)-Re(1)   | 114.1(9)  | N(2)-C(17)-C(16)  | 120(2)    |
| C(2)-C(1)-Ag(1)    | 172.1(8)  | P(1)-C(20)-P(2)   | 113.0(5)  |
| C(2)-C(1)-Ag(1)#2  | 104.0(7)  | C(26)-C(21)-C(22) | 119.0(10) |
| Ag(1)-C(1)-Ag(1)#2 | 81.1(3)   | C(26)-C(21)-P(1)  | 119.3(8)  |
| C(2)-C(1)-Ag(2)    | 100.5(6)  | C(22)-C(21)-P(1)  | 121.7(7)  |
| Ag(1)-C(1)-Ag(2)   | 79.7(3)   | C(21)-C(22)-C(23) | 117.6(11) |
| Ag(1)#2-C(1)-Ag(2) | 133.1(4)  | C(24)-C(23)-C(22) | 122.5(14) |
| C(1)-C(2)-C(3)     | 176.1(11) | C(25)-C(24)-C(23) | 117.9(13) |
| C(4)-C(3)-C(2)     | 175.6(12) | C(24)-C(25)-C(26) | 124.0(10) |
| C(3)-C(4)-Re(1)    | 173.7(11) | C(21)-C(26)-C(25) | 118.9(11) |
| O(1)-C(5)-Re(1)    | 174.5(19) | C(28)-C(27)-C(32) | 118.4(10) |
| O(2)-C(6)-Re(1)    | 173.5(17) | C(28)-C(27)-P(1)  | 122.9(9)  |
| O(3)-C(7)-Re(1)    | 178.6(18) | C(32)-C(27)-P(1)  | 118.6(8)  |
| C(9)-C(8)-N(1)     | 117.5(17) | C(27)-C(28)-C(29) | 120.6(12) |
| C(10)-C(9)-C(8)    | 125.3(19) | C(30)-C(29)-C(28) | 119.9(13) |
| C(9)-C(10)-C(11)   | 120.6(17) | C(29)-C(30)-C(31) | 120.1(13) |
| C(10)-C(11)-C(12)  | 114.7(11) | C(32)-C(31)-C(30) | 121.2(13) |
| C(10)-C(11)-C(18)  | 125.3(11) | C(31)-C(32)-C(27) | 119.8(11) |
| C(12)-C(11)-C(18)  | 120.0     | C(38)-C(33)-C(34) | 120.4(9)  |
| N(1)-C(12)-C(13)   | 115.0(10) | C(38)-C(33)-P(2)  | 118.8(8)  |
| N(1)-C(12)-C(11)   | 125.0(10) | C(34)-C(33)-P(2)  | 120.8(8)  |
| C(13)-C(12)-C(11)  | 120.0     | C(35)-C(34)-C(33) | 118.6(11) |
| C(12)-C(13)-C(14)  | 120.0     | C(36)-C(35)-C(34) | 118.8(12) |
| C(12)-C(13)-N(2)   | 119.0(9)  | C(37)-C(36)-C(35) | 121.5(11) |
| C(14)-C(13)-N(2)   | 121.0(9)  | C(38)-C(37)-C(36) | 119.4(12) |
| C(15)-C(14)-C(19)  | 122.8(13) | C(37)-C(38)-C(33) | 121.3(11) |
| C(15)-C(14)-C(13)  | 117.2(13) | C(40)-C(39)-C(44) | 115.6(11) |
| C(19)-C(14)-C(13)  | 120.0     | C(40)-C(39)-P(2)  | 126.5(9)  |
| C(14)-C(19)-C(18)  | 120.0     | C(44)-C(39)-P(2)  | 117.8(8)  |
| C(14)-C(19)-Br(2)  | 119.0(5)  | C(41)-C(40)-C(39) | 126.0(13) |
| C(18)-C(19)-Br(2)  | 121.0(5)  | C(42)-C(41)-C(40) | 119.7(14) |
| C(19)-C(18)-C(11)  | 120.0     | C(41)-C(42)-C(43) | 117.7(14) |
| C(19)-C(18)-Br(1)  | 120.1(5)  | C(42)-C(43)-C(44) | 121.5(15) |
| C(11)-C(18)-Br(1)  | 119.9(5)  | C(39)-C(44)-C(43) | 119.4(13) |
| C(16)-C(15)-C(14)  | 126(2)    | F(5)-P(3)-F(3)    | 172(3)    |

|                |           |
|----------------|-----------|
| F(5)-P(3)-F(6) | 90(3)     |
| F(3)-P(3)-F(6) | 97.3(19)  |
| F(5)-P(3)-F(4) | 96(3)     |
| F(3)-P(3)-F(4) | 81.7(14)  |
| F(6)-P(3)-F(4) | 96.2(15)  |
| F(5)-P(3)-F(1) | 94(3)     |
| F(3)-P(3)-F(1) | 79.0(16)  |
| F(6)-P(3)-F(1) | 176(2)    |
| F(4)-P(3)-F(1) | 85.3(15)  |
| F(5)-P(3)-F(2) | 95(3)     |
| F(3)-P(3)-F(2) | 86.6(17)  |
| F(6)-P(3)-F(2) | 91.9(19)  |
| F(4)-P(3)-F(2) | 166.5(16) |
| F(1)-P(3)-F(2) | 85.9(15)  |

---

Symmetry transformations used to generate equivalent atoms:

#1  $y, -x+3/2, -z+1/2$  #2  $-y+3/2, x, -z+1/2$  #3  $-x+3/2, -y+3/2, z$

Table 4. Anisotropic displacement parameters ( $\text{\AA}^2 \times 10^3$ ) for mar867. The anisotropic displacement factor exponent takes the form:  $-2\pi^2 [ h^2 a^{*2} U^{11} + \dots + 2 h k a^* b^* U^{12} ]$

|       | $U^{11}$ | $U^{22}$ | $U^{33}$ | $U^{23}$ | $U^{13}$ | $U^{12}$ |
|-------|----------|----------|----------|----------|----------|----------|
| Re(1) | 101(1)   | 73(1)    | 148(1)   | 38(1)    | 12(1)    | -4(1)    |
| Ag(1) | 69(1)    | 60(1)    | 48(1)    | 1(1)     | 2(1)     | 8(1)     |
| Ag(2) | 70(1)    | 65(1)    | 47(1)    | 0        | 0        | 16(1)    |
| Br(1) | 99(1)    | 141(2)   | 343(3)   | 109(2)   | 39(2)    | -3(1)    |
| Br(2) | 207(2)   | 113(2)   | 333(3)   | 44(2)    | 161(2)   | 23(2)    |
| P(1)  | 67(2)    | 58(2)    | 47(1)    | 2(1)     | -4(1)    | 10(1)    |
| P(2)  | 68(2)    | 59(2)    | 43(1)    | -2(1)    | -2(1)    | 12(1)    |
| O(1)  | 160(12)  | 104(9)   | 293(16)  | 94(10)   | 33(11)   | 0(8)     |
| O(2)  | 150(11)  | 152(11)  | 188(11)  | 11(9)    | 48(9)    | 18(9)    |
| O(3)  | 148(12)  | 167(13)  | 245(16)  | 62(11)   | -57(11)  | 6(10)    |
| N(1)  | 78(8)    | 71(7)    | 173(12)  | 34(7)    | 12(8)    | -14(6)   |
| N(2)  | 208(16)  | 76(8)    | 97(8)    | 26(6)    | 8(9)     | -40(9)   |
| C(1)  | 66(6)    | 73(7)    | 33(4)    | -7(4)    | 5(4)     | -4(5)    |
| C(2)  | 66(7)    | 58(7)    | 54(5)    | 5(5)     | -4(4)    | -7(5)    |
| C(3)  | 66(7)    | 82(9)    | 86(7)    | 1(6)     | 4(5)     | -10(6)   |
| C(4)  | 92(9)    | 86(9)    | 100(8)   | 9(7)     | 5(7)     | -19(7)   |
| C(5)  | 123(14)  | 115(14)  | 189(15)  | 51(13)   | 23(12)   | 15(11)   |
| C(6)  | 94(11)   | 85(11)   | 230(20)  | 46(12)   | 43(12)   | -2(9)    |
| C(7)  | 118(14)  | 109(12)  | 157(13)  | 47(10)   | 6(11)    | 3(11)    |
| C(8)  | 98(12)   | 160(16)  | 116(11)  | 22(10)   | -6(9)    | -20(11)  |
| C(9)  | 136(17)  | 190(20)  | 124(12)  | 12(12)   | 2(13)    | -46(15)  |
| C(10) | 94(12)   | 124(14)  | 211(18)  | 63(13)   | 18(12)   | -17(10)  |
| C(12) | 111(12)  | 72(9)    | 134(11)  | 36(8)    | 16(10)   | -18(8)   |
| C(13) | 108(12)  | 63(8)    | 150(13)  | 35(8)    | 21(11)   | 6(8)     |
| C(15) | 149(18)  | 101(13)  | 240(30)  | 58(15)   | 12(17)   | -21(14)  |
| C(16) | 270(30)  | 116(16)  | 130(14)  | 7(12)    | 70(20)   | -20(20)  |
| C(17) | 190(20)  | 92(13)   | 200(20)  | 64(14)   | -32(18)  | -27(13)  |
| C(20) | 64(6)    | 62(6)    | 40(4)    | -3(4)    | -3(4)    | 4(5)     |
| C(21) | 71(7)    | 60(7)    | 71(6)    | 3(5)     | -12(5)   | 12(5)    |
| C(22) | 156(13)  | 61(8)    | 84(7)    | 10(6)    | -21(7)   | 17(8)    |
| C(23) | 150(14)  | 67(9)    | 133(12)  | 15(8)    | -19(10)  | -17(9)   |



|       |         |         |         |         |         |         |
|-------|---------|---------|---------|---------|---------|---------|
| C(24) | 101(10) | 75(9)   | 119(10) | 26(8)   | -9(8)   | 6(7)    |
| C(25) | 110(10) | 108(11) | 61(6)   | 20(7)   | 11(6)   | 16(8)   |
| C(26) | 104(9)  | 71(7)   | 52(5)   | 20(5)   | 0(5)    | 12(6)   |
| C(27) | 70(7)   | 63(7)   | 60(5)   | 8(5)    | -1(5)   | 16(6)   |
| C(28) | 78(9)   | 82(8)   | 92(7)   | -13(6)  | 4(6)    | 13(7)   |
| C(29) | 87(11)  | 114(12) | 121(10) | -11(9)  | 8(8)    | 34(9)   |
| C(30) | 73(9)   | 115(12) | 132(11) | 23(9)   | -5(8)   | -15(9)  |
| C(31) | 89(11)  | 81(10)  | 197(15) | -12(10) | 9(10)   | -11(8)  |
| C(32) | 63(8)   | 65(8)   | 126(9)  | -17(7)  | 1(6)    | 6(6)    |
| C(33) | 83(8)   | 72(7)   | 51(5)   | -6(5)   | 0(5)    | 1(6)    |
| C(34) | 109(9)  | 78(7)   | 47(5)   | -17(5)  | -3(5)   | 6(7)    |
| C(35) | 159(14) | 100(10) | 56(6)   | -12(6)  | -5(7)   | 10(9)   |
| C(36) | 137(13) | 128(12) | 69(7)   | -12(8)  | -18(8)  | -16(10) |
| C(37) | 101(10) | 115(11) | 80(8)   | -12(7)  | -24(7)  | 14(8)   |
| C(38) | 92(9)   | 83(8)   | 57(6)   | -10(5)  | -10(6)  | 20(7)   |
| C(39) | 75(7)   | 48(6)   | 51(5)   | 4(4)    | 9(4)    | 13(5)   |
| C(40) | 93(10)  | 83(8)   | 68(6)   | 13(5)   | -3(6)   | 6(8)    |
| C(41) | 66(9)   | 108(12) | 127(10) | 31(9)   | 22(7)   | 13(8)   |
| C(42) | 76(10)  | 163(18) | 109(10) | 31(10)  | 8(8)    | -18(11) |
| C(43) | 143(15) | 89(10)  | 113(10) | 15(8)   | -16(10) | -27(11) |
| C(44) | 90(9)   | 99(10)  | 66(6)   | 4(6)    | -5(6)   | -11(8)  |
| P(3)  | 119(8)  | 222(12) | 144(7)  | 18(8)   | -33(6)  | -82(8)  |

---

Table 5. Hydrogen coordinates ( $\times 10^4$ ) and isotropic displacement parameters ( $\text{\AA}^2 \times 10^3$ ) for mar867.

|        | x     | y     | z     | U(eq) |
|--------|-------|-------|-------|-------|
| H(8)   | 8629  | 10183 | 2111  | 150   |
| H(9)   | 9360  | 10001 | 2636  | 179   |
| H(10)  | 9980  | 9728  | 1953  | 171   |
| H(15)  | 9539  | 9104  | -1671 | 196   |
| H(16)  | 8793  | 9137  | -2152 | 208   |
| H(17)  | 8162  | 9532  | -1330 | 193   |
| H(20A) | 7997  | 6155  | 482   | 66    |
| H(20B) | 8531  | 6204  | 158   | 66    |
| H(22)  | 8499  | 5483  | 969   | 120   |
| H(23)  | 8497  | 4749  | 1680  | 140   |
| H(24)  | 8452  | 4741  | 3002  | 118   |
| H(25)  | 8397  | 5445  | 3644  | 112   |
| H(26)  | 8413  | 6189  | 3021  | 91    |
| H(28)  | 9328  | 5970  | 808   | 101   |
| H(29)  | 10159 | 6121  | 682   | 129   |
| H(30)  | 10484 | 6832  | 1164  | 128   |
| H(31)  | 9987  | 7405  | 1738  | 147   |
| H(32)  | 9159  | 7284  | 1825  | 102   |
| H(34)  | 8445  | 6143  | -1162 | 94    |
| H(35)  | 8158  | 5797  | -2337 | 126   |
| H(36)  | 7447  | 6101  | -2899 | 134   |
| H(37)  | 7018  | 6724  | -2309 | 119   |
| H(38)  | 7314  | 7078  | -1189 | 93    |
| H(40)  | 9074  | 6674  | -629  | 97    |
| H(41)  | 9778  | 7060  | -855  | 121   |
| H(42)  | 9826  | 7888  | -713  | 140   |
| H(43)  | 9142  | 8302  | -284  | 138   |
| H(44)  | 8414  | 7888  | -28   | 102   |

---

<sup>i</sup> Otwinowski, Z. and Minor, W., "Processing of X-ray Diffraction Data Collected in Oscillation Mode", Methods in Enzymology, Volume 276: Macromolecular Crystallography, part A, p. 307-326, 1997. Carter C. W., Sweet Jr. & R. M., Eds., Academic Press.

<sup>ii</sup> SHELXS97, Sheldrick, G. M. (1997). SHELX97. Programs for Crystal Structure Analysis (Release 97-2). University of Goettingen, Germany.

<sup>iii</sup> SHELXL97, Sheldrick, G. M. (1997). SHELX97. Programs for Crystal Structure Analysis (Release 97-2). University of Goettingen, Germany.

<sup>iv</sup>  $R_{\text{int}} = \Sigma |F_o^2 - F_o^2(\text{mean})| / \Sigma [F_o^2]$

<sup>v</sup> Since the structure refinements are against  $F^2$ , R-indices based on  $F^2$  are larger than (more than double) those based on F. For comparison with older refinements based on F and an OMIT threshold, a conventional index  $R_1$  based on observed F values larger than  $4\sigma(F_o)$  is also given (corresponding to Intensity  $\geq 2\sigma(I)$ ).  $wR_2 = \{ \Sigma [w(F_o^2 - F_c^2)^2] / \Sigma [w(F_o^2)^2] \}^{1/2}$ ,  $R_1 = \Sigma ||F_o| - |F_c|| / \Sigma |F_o|$ , The Goodness of Fit is always based on  $F^2$ :  $\text{Goof} = S = \{ \Sigma [w(F_o^2 - F_c^2)^2] / (n - p) \}^{1/2}$ , where n is the number of reflections and p is the total number of parameters refined. The weighting scheme is:  $w = 1/[\sigma^2(F_o^2) + (aP)^2 + bP]$ , where P is  $[2F_c^2 + \text{Max}(F_o^2, 0)]/3$ .

<sup>vi</sup> ORTEP3 for Windows - Farrugia, L. J. (1997) J. Appl. Cryst. 30, 565.

<sup>vii</sup> The crystallographic data summarized in this reported are abstracted from the previous tables and the experiment record.
